# Supplementary material for: The Lesson Learned from the Unique Evolutionary Story of Avirulence Gene AvrPii of Magnaporthe oryzae
Source: MDPI journal article supplement (doi:10.3390/genes14051065), 2023-05-11
Supplement: s1 [file s1]

**Table S1.** PCR primers and programs used in the current study

| Primer code /<br>sequence (5'→3') <sup>a</sup> | Annealing<br>temp (°C) <sup>b</sup> | Restriction<br>enzyme (°C) <sup>c</sup> | Use of primers                                           |
|------------------------------------------------|-------------------------------------|-----------------------------------------|----------------------------------------------------------|
| <b>TAIL-PCR</b>                                | NA                                  | NA                                      | TAIL-PCR amplification                                   |
| SP1: ATGCAACTTTCCAAAATTACTTTTCGCTAT            |                                     |                                         |                                                          |
| SP2: GGCAACACTGAGGTCGCAACCATCT                 |                                     |                                         |                                                          |
| SP3: GGCAGCGATGATTCCGACGCGTATT                 |                                     |                                         |                                                          |
| SP4: AATACGCGTCGGAATCATCGCTGCC                 |                                     |                                         |                                                          |
| SP5: AGATGGTTGCGACCTCAGTGTGTC                  |                                     |                                         |                                                          |
| SP6: ATAGCGAAAGTAATTTTGAAAGTTGCAT              |                                     |                                         |                                                          |
| AD: STTGNTASTNCTNTGC                           |                                     |                                         |                                                          |
| <b>The key primer</b>                          |                                     |                                         |                                                          |
| <b><i>AvrPii-J/C-CDS</i></b>                   | 58                                  | NA                                      | J/C-CDS amplification                                    |
| F: ATGCAACTTTCCAAAATTAC                        |                                     |                                         |                                                          |
| R: TTAGTTGCATTTATGATTA                         |                                     |                                         |                                                          |
| <b><i>AvrPii-J-FL/GT</i></b>                   | 58                                  | NA/ <i>Asc</i> I (37)                   | J-FL/GT amplification<br>( <i>AvrPii-J</i> cloning)      |
| F: TTGGCGCGCCTGGTAGATATCCGCTGAC                |                                     |                                         |                                                          |
| R: TTGGCGCGCCCAGATTTGAACTTTGGT                 |                                     |                                         |                                                          |
| <b><i>AvrPii-J-RS</i></b>                      | 58                                  | NA                                      | J-RS amplification<br>( <i>AvrPii-J</i> resequencing)    |
| F: TGGTAGATATCCGCTGACTGG                       |                                     |                                         |                                                          |
| R: TAGCCATTATCCAAGGGTTGCTCCACTCT               |                                     |                                         |                                                          |
| <b><i>AvrPii-J-MK1</i></b>                     | 58                                  | NA                                      | J-MK1 amplification<br>( <i>AvrPii-J</i> genotyping)     |
| F: GTATAATTCCTTTTCTTCCCTCCTT                   |                                     |                                         |                                                          |
| R: CTAATTTAAATCGTGCGCTTTCAGA                   |                                     |                                         |                                                          |
| <b><i>AvrPii-J-MK2</i></b>                     | 58                                  | NA                                      | J-MK2 amplification<br>( <i>AvrPii-J</i> genotyping)     |
| F: TGGTAGATATCCGCTGACTGG                       |                                     |                                         |                                                          |
| R: CATATAATGCAATAGCGAAAGTAAT                   |                                     |                                         |                                                          |
| <b><i>AvrPii-C-FL/RS</i></b>                   | 58                                  | NA                                      | C-FL/RS amplification<br>( <i>AvrPii-C</i> resequencing) |
| F: AAGGCATAATAATTTTCGTAAAAAGCGGTCTAA           |                                     |                                         |                                                          |
| R: ATGTATGCCTGGCCGTGACAATAACCC                 |                                     |                                         |                                                          |
| <b><i>AvrPii-C-GT</i></b>                      | 58                                  | <i>Asc</i> I (37)                       | C-GT amplification<br>( <i>AvrPii-C</i> cloning)         |
| F: TTGGCGCGCCTCAGCGGATATTCACC                  |                                     |                                         |                                                          |
| R: TTGGCGCGCCTAGATTTTCAGGGTGC                  |                                     |                                         |                                                          |
| <b><i>AvrPii-C-MK1</i></b>                     | 58                                  | NA                                      | C-MK1 amplification<br>( <i>AvrPii-C</i> genotyping)     |
| F: TCGTTATATTTCCATTGCTATTCAT                   |                                     |                                         |                                                          |
| R: TAAAAATGAGTTAAATTATGCGTT                    |                                     |                                         |                                                          |
| <b><i>AvrPii-C-MK2</i></b>                     | 58                                  | NA                                      | C-MK2 amplification<br>( <i>AvrPii-C</i> genotyping)     |
| F: CATAATAATTTTCGTAAAAAGCGGTC                  |                                     |                                         |                                                          |
| R: CATATAATGCAATAGCGAAAGTAAT                   |                                     |                                         |                                                          |
| <b>Domain swapping</b>                         |                                     |                                         |                                                          |
| <b>J<sub>pro</sub></b>                         | 58                                  | NA                                      | J <sub>pro</sub> amplification                           |
| F: TGGTAGATATCCGCTGAC                          |                                     |                                         |                                                          |

|                                               |    |                   |                                     |
|-----------------------------------------------|----|-------------------|-------------------------------------|
| R: AATTTTGGAGAGTTGCATTTTGGTAAATTGGAA          |    |                   |                                     |
| <b>C<sub>CDS+3'</sub></b>                     | 58 | NA                | C <sub>CDS+3'</sub> amplification   |
| F: TTCCAATTTACCAAAATGCAACTCTCCAAAATT          |    |                   |                                     |
| R: TAGATTTTCAGGGTGC                           |    |                   |                                     |
| <b>J<sub>pro</sub>-F/C<sub>CDS+3'</sub>-R</b> | 58 | <i>Asc</i> I (37) | Mai1 construction                   |
| F: TTGGCGCGCCTGGTAGATATCCGCTGAC               |    |                   |                                     |
| R: TTGGCGCGCCTAGATTTTCAGGGTGC                 |    |                   |                                     |
| <b>C<sub>pro</sub></b>                        | 58 | NA                | C-pro amplification                 |
| F: TCAGCGGATATTCACC                           |    |                   |                                     |
| R: AATTTTGGAAAGTTGCATTTTGGTAAGTTGGAA          |    |                   |                                     |
| <b>J<sub>CDS+3'</sub></b>                     | 58 | NA                | J <sub>CDS+3'</sub> amplification   |
| F: TTCCAAGTTACCAAAATGCAACTTTCCAAAATT          |    |                   |                                     |
| R: CAGATTTGGAACCTTGGT                         |    |                   |                                     |
| <b>C<sub>pro</sub>-F/J<sub>CDS+3'</sub>-R</b> | 58 | <i>Asc</i> I (37) | Mai2 construction                   |
| F: TTGGCGCGCCTCAGCGGATATTCACC                 |    |                   |                                     |
| R: TTGGCGCGCCCAGATTTGGAACCTTGGT               |    |                   |                                     |
| <b>J/C-1</b>                                  | 58 | NA                | Mai3 construction                   |
| F: CATTATATGCAGTCGGAATCGCAGCACTT              |    |                   |                                     |
| R: CAATAGCGAAAGTAATTTTGGAGAGTTGCAT            |    |                   |                                     |
| <b>J/C-2</b>                                  | 58 | NA                | Mai4 construction                   |
| F: CATCTCCGACGTTAAACTTGGACCCCGCA              |    |                   |                                     |
| R: GTTGCACCTCAGTGTTGCCATTTAGGCAGGC            |    |                   |                                     |
| <b>J/C-3</b>                                  | 58 | NA                | Mai5 construction                   |
| F: ATGCGGCTTCGGCAGCGATGATTCC                  |    |                   |                                     |
| R: TTGGAGCAATAATAATAAGTCTTGTCGC               |    |                   |                                     |
| <b>J<sub>pro</sub>+CDS</b>                    | 58 | NA                | J <sub>pro</sub> +CDS amplification |
| F: TGGTAGATATCCGCTGAC                         |    |                   |                                     |
| R: AGATATCAACTTACATTAGTTGCATTTATGA            |    |                   |                                     |
| <b>C<sub>3'</sub></b>                         | 58 | NA                | C <sub>3'</sub> amplification       |
| F: TCATAAATGCAACTAATGTAAGTTGATATCT            |    |                   |                                     |
| R: TAGATTTTCAGGGTGC                           |    |                   |                                     |
| <b>J<sub>pro</sub>+CDS-F/C<sub>3'</sub>-R</b> | 58 | <i>Asc</i> I (37) | Mai6 construction                   |
| F: TTGGCGCGCCTGGTAGATATCCGCTGAC               |    |                   |                                     |
| R: TTGGCGCGCCTAGATTTTCAGGGTGC                 |    |                   |                                     |
| <b>C<sub>pro</sub>+CDS</b>                    | 58 | NA                | C <sub>pro</sub> +CDS amplification |
| F: TCAGCGGATATTCACC                           |    |                   |                                     |
| R: CAGATTTTAACTTACATTACTTGCACTTG              |    |                   |                                     |
| <b>J<sub>3'</sub></b>                         | 58 | NA                | J <sub>3'</sub> amplification       |
| F: CAAGTGCAAGTAATGTAAGTTAAAATCTG              |    |                   |                                     |
| R: CAGATTTGGAACCTTGGT                         |    |                   |                                     |
| <b>C<sub>pro</sub>+CDS-F/J<sub>3'</sub>-R</b> | 58 | <i>Asc</i> I (37) | Mai7 construction                   |
| F: TTGGCGCGCCTCAGCGGATATTCACC                 |    |                   |                                     |

R: TTGGCGCGCCCAGATTTGGAACTTTGGT

# **Others**

**HYG**

58

NA

Genotyping of  
transgenic progeny

F: TTGGCTGGAGCTAGTGGAGGT

R: TCTGCTGCTCCATACAAGCCAAC

The specific program for TAIL-PCR system

| Reaction round | Number of cycle | Cycle parameter                                                                                                |
|----------------|-----------------|----------------------------------------------------------------------------------------------------------------|
| I              | 1               | 94°C/2 min; 95°C/1 min.                                                                                        |
|                | 5               | 94°C/15 s; 62°C/1 min; 72°C/2 min.                                                                             |
|                | 1               | 94°C/15 s; 25°C/3 min;<br>up to 72°C by 0. 2°C/s; 72°C/2 min.                                                  |
|                | 15              | 94°C/10 s; 62°C/1 min; 72°C/2 min;<br>94°C/10 s; 62°C/1 min; 72°C/2 min;<br>94°C/10 s; 44°C/1 min; 72°C 2 min. |
|                | 1               | 72°C/2 min.                                                                                                    |
| II             | 15              | 94°C/10 s; 62°C/1 min; 72°C/2 min;<br>94°C/10 s; 62°C/1 min; 72°C/2 min;<br>94°C/10 s; 44°C/1 min; 72°C/2 min. |
|                | 1               | 72°C/2 min                                                                                                     |
| III            | 15              | 94°C/10 s; 62°C/1 min; 72°C/2 min;<br>94°C/10 s; 62°C/1 min; 72°C/2 min;<br>94°C/10 s; 44°C/1 min; 72°C/2 min. |
|                | 1               | 72°C/5 min.                                                                                                    |

<sup>a</sup> For transformation test, sequence underlined was responding to the common restriction enzyme *Asc* I for ligating fragments (*AvrPii* and its mutants) into the binary vectors, pBHT2-*Asc*I. F, forward; R, reverse.

<sup>b</sup> The regular PCR system was initiated by a 95°C/3 min denaturation, followed by 35 cycles of 95°C/15 s, 58°C/15 s, 72°C/1 min and a final extension step of 72°C/2 min. The Tail-PCR system was according to the specific program shown above. Amplicons were electrophoresed through a 1% agarose gel.

<sup>c</sup> The number shown in parentheses refers to the temperature at which the restriction digestion reaction was run.
