# Supplementary material for: The Lesson Learned from the Unique Evolutionary Story of Avirulence Gene AvrPii of Magnaporthe oryzae
Source: MDPI journal article supplement (doi:10.3390/genes14051065), 2023-05-11
Supplement: s1 [file s1]

| Table S2. Genotypes and phenotypes of 377 isolates of <i>M. oryzae</i> characterized in the current study |                            |                              |                |                           |                                              |                              |                      |                      |                      |                                         |                                            |
|-----------------------------------------------------------------------------------------------------------|----------------------------|------------------------------|----------------|---------------------------|----------------------------------------------|------------------------------|----------------------|----------------------|----------------------|-----------------------------------------|--------------------------------------------|
|                                                                                                           |                            |                              |                |                           |                                              | Genotype (1, 0) <sup>d</sup> |                      |                      |                      |                                         |                                            |
| Isolate                                                                                                   | Cropping area <sup>a</sup> | Sampled rice cultivar / host | Sampled county | Sampled time <sup>b</sup> | Phenotype on <i>Pii</i> carrier <sup>c</sup> | <i>AvrPii</i> -C-MK1         | <i>AvrPii</i> -C-MK2 | <i>AvrPii</i> -J-MK1 | <i>AvrPii</i> -J-MK2 | <i>AvrPii</i> resequencing <sup>e</sup> | Integrated phenotype/genotype <sup>f</sup> |
| Guangdong rice population (Σ60)                                                                           |                            |                              |                |                           |                                              | 4                            | 4                    | 2                    | 2                    | 4C+2J                                   |                                            |
| CHL2345                                                                                                   | GD I                       | Mabayinzhan                  | Qujiang        | 2008E                     | V                                            | 0                            | 0                    | 0                    | 0                    |                                         | V/0                                        |
| CHL2358                                                                                                   | GD I                       | Shanyou 428                  | Wengyuan       | 2008E                     | V                                            | 0                            | 0                    | 0                    | 0                    |                                         | V/0                                        |
| CHL2370                                                                                                   | GD II                      | Jinshanyou 3182              | Longchuan      | 2008E                     | V                                            | 0                            | 0                    | 0                    | 0                    |                                         | V/0                                        |
| CHL2375                                                                                                   | GD I                       | Shanyou 253                  | Renhua         | 2008E                     | V                                            | 0                            | 0                    | 0                    | 0                    |                                         | V/0                                        |
| CHL2384                                                                                                   | GD I                       | Changguidao                  | Lianping       | 2008E                     | V                                            | 0                            | 0                    | 0                    | 0                    |                                         | V/0                                        |
| CHL2386                                                                                                   | GD II                      | Fengsimiao                   | Gaoyao         | 2008E                     | V                                            | 0                            | 0                    | 0                    | 0                    |                                         | V/0                                        |
| CHL2387                                                                                                   | GD II                      | Shanyou 428                  | Meixian        | 2008E                     | V                                            | 0                            | 0                    | 0                    | 0                    |                                         | V/0                                        |
| CHL2394                                                                                                   | GD II                      | Nuo                          | Meixian        | 2008E                     | V                                            | 0                            | 0                    | 0                    | 0                    |                                         | V/0                                        |
| CHL2401                                                                                                   | GD II                      | Huayougui 99                 | Wuhua          | 2008E                     | V                                            | 0                            | 0                    | 0                    | 0                    |                                         | V/0                                        |
| CHL2409                                                                                                   | GD II                      | Zhongerruanzhan              | Longmen        | 2008E                     | V                                            | 0                            | 0                    | 0                    | 0                    |                                         | V/0                                        |
| CHL2412                                                                                                   | GD II                      | Shanyougui 99                | Fengkai        | 2008E                     | A                                            | 1                            | 1                    | 0                    | 0                    | ✓                                       | A/1C                                       |
| CHL2416                                                                                                   | GD II                      | Meixiangzhan                 | Xinxing        | 2008E                     | V                                            | 0                            | 0                    | 0                    | 0                    |                                         | V/0                                        |
| CHL2417                                                                                                   | GD II                      | Tianyou 290                  | Xingning       | 2008E                     | V                                            | 0                            | 0                    | 0                    | 0                    |                                         | V/0                                        |
| CHL2419                                                                                                   | GD II                      | Changguidao                  | Jiexi          | 2008E                     | V                                            | 0                            | 0                    | 0                    | 0                    |                                         | V/0                                        |
| CHL2422                                                                                                   | GD III                     | Zaoyinzhan                   | Yangjiang      | 2008E                     | V                                            | 0                            | 0                    | 0                    | 0                    |                                         | V/0                                        |
| CHL2423                                                                                                   | GD III                     | Sanyinian                    | Yangjiang      | 2008E                     | V                                            | 0                            | 0                    | 0                    | 0                    |                                         | V/0                                        |
| CHL2426                                                                                                   | GD III                     | Youyou 389                   | Xinyi          | 2008E                     | V                                            | 0                            | 0                    | 0                    | 0                    |                                         | V/0                                        |
| CHL2433                                                                                                   | GD III                     | Huayou 86                    | Xinyi          | 2008E                     | V                                            | 0                            | 0                    | 0                    | 0                    |                                         | V/0                                        |
| CHL2436                                                                                                   | GD III                     | Huayou 86                    | Xinyi          | 2008E                     | V                                            | 0                            | 0                    | 0                    | 0                    |                                         | V/0                                        |
| CHL2438                                                                                                   | GD III                     | Changguidao                  | Gaozhou        | 2008E                     | V                                            | 0                            | 0                    | 0                    | 0                    |                                         | V/0                                        |
| CHL2441                                                                                                   | GD III                     | Zajiaodao                    | Gaozhou        | 2008E                     | V                                            | 0                            | 0                    | 0                    | 0                    |                                         | V/0                                        |
| CHL2442                                                                                                   | GD III                     | Tianyou 998                  | Haifeng        | 2008E                     | V                                            | 0                            | 0                    | 0                    | 0                    |                                         | V/0                                        |
| CHL2444                                                                                                   | GD III                     | Guangyinzhan                 | Foshan         | 2008E                     | V                                            | 0                            | 0                    | 0                    | 0                    |                                         | V/0                                        |
| CHL2446                                                                                                   | GD III                     | Shuanghuangzhan              | Jiedong        | 2008E                     | V                                            | 0                            | 0                    | 0                    | 0                    |                                         | V/0                                        |
| CHL2448                                                                                                   | GD III                     | Teyou 721                    | Chaoan         | 2008E                     | V                                            | 0                            | 0                    | 0                    | 0                    |                                         | V/0                                        |

|         |        |              |           |       |   |   |   |   |   |    |        |
|---------|--------|--------------|-----------|-------|---|---|---|---|---|----|--------|
| CHL2449 | GD II  | Zengyouzhan  | Zengcheng | 2008E | V | 0 | 0 | 0 | 0 |    | V/0    |
| CHL2452 | GD III | Fengqin      | Lianjiang | 2008E | V | 0 | 0 | 0 |   |    | V/0    |
| CHL2455 | GD III | Bairizao     | Huidong   | 2008E | V | 0 | 0 | 0 | 0 |    | V/0    |
| CHL2457 | GD III | Zhanyou 226  | Huidong   | 2008E | V | 0 | 0 | 0 | 0 |    | V/0    |
| CHL2458 | GD III | Teyou 721    | Yangchun  | 2008E | A | 1 | 1 | 0 | 0 | ✓  | A/1C   |
| CHL2464 | GD III | Taishanbai   | Kaiping   | 2008E | V | 0 | 0 | 0 | 0 |    | V/0    |
| CHL2467 | GD I   | Meixiangzhan | Renhua    | 2008L | V | 0 | 0 | 0 | 0 |    | V/0    |
| CHL2488 | GD I   | Weixiang     | Lechang   | 2008L | V | 0 | 0 | 0 | 0 |    | V/0    |
| CHL2490 | GD I   | Guodao No.1  | Ruyuan    | 2008L | V | 0 | 0 | 0 | 0 |    | V/0    |
| CHL2491 | GD I   | Jinyou 207   | Nanxiong  | 2008L | A | 1 | 1 | 1 | 1 | ✓✓ | A/1C_J |
| CHL2497 | GD I   | Meixiangzhan | Qujiang   | 2008L | A | 1 | 1 | 0 | 0 | ✓  | A/1C   |
| CHL2507 | GD I   | Zayou        | Wengyuan  | 2008L | V | 0 | 0 | 0 | 0 |    | V/0    |
| CHL2513 | GD I   | Shanyou 46   | Xinfeng   | 2008L | V | 0 | 0 | 0 | 0 |    | V/0    |
| CHL2516 | GD I   | Shanyou 82   | Jiaoling  | 2008L | V | 0 | 0 | 0 | 0 |    | V/0    |
| CHL2518 | GD II  | Yuxiang 88   | Longchuan | 2008L | V | 0 | 0 | 0 | 0 |    | V/0    |
| CHL2534 | GD II  | Shanyou 122  | Meixian   | 2008L | V | 0 | 0 | 0 | 0 |    | V/0    |
| CHL2548 | GD II  | Yixiang 3003 | Dapu      | 2008L | V | 0 | 0 | 0 | 0 |    | V/0    |
| CHL2549 | GD II  | Shanyou 122  | Dapu      | 2008L | V | 0 | 0 | 0 | 0 |    | V/0    |
| CHL2551 | GD II  | Boyoyun 3    | Zijin     | 2008L | V | 0 | 0 | 0 | 0 |    | V/0    |
| CHL2560 | GD III | Huanghuazhan | Boluo     | 2008L | V | 0 | 0 | 0 | 0 |    | V/0    |
| CHL2561 | GD II  | Longyou 665  | Fougang   | 2008L | V | 0 | 0 | 0 | 0 |    | V/0    |
| CHL2563 | GD III | Zhanzinuo    | Huidong   | 2008L | V | 0 | 0 | 0 | 0 |    | V/0    |
| CHL2571 | GD II  | Qixinzhan    | Longmen   | 2008L | V | 0 | 0 | 0 | 0 |    | V/0    |
| CHL2581 | GD II  | Qiuyou 452   | Qingxin   | 2008L | V | 0 | 0 | 0 | 0 |    | V/0    |
| CHL2584 | GD II  | Zayounuo     | Huaiji    | 2008L | V | 0 | 0 | 0 | 0 |    | V/0    |
| CHL2586 | GD II  | Zhenguizhong | Yingde    | 2008L | V | 0 | 0 | 0 | 0 |    | V/0    |
| CHL2593 | GD II  | Qiuyou 3008  | Yunfu     | 2008L | V | 0 | 0 | 0 | 0 |    | V/0    |
| CHL2600 | GD II  | Qiuyou 3008  | Deqing    | 2008L | A | 0 | 0 | 1 | 1 | ✓  | A/1J   |
| CHL2604 | GD III | Guinongzhan  | Haifeng   | 2008L | V | 0 | 0 | 0 | 0 |    | V/0    |
| CHL2606 | GD III | Xiaonongzhan | Zhuhai    | 2008L | V | 0 | 0 | 0 | 0 |    | V/0    |

|                               |        |                 |           |       |   |           |           |           |           |                |        |
|-------------------------------|--------|-----------------|-----------|-------|---|-----------|-----------|-----------|-----------|----------------|--------|
| CHL2608                       | GD III | Taiwanyouzhao   | Yangchun  | 2008L | V | 0         | 0         | 0         | 0         |                | V/0    |
| CHL2615                       | GD III | Bo II You 15    | Lianjiang | 2008L | V | 0         | 0         | 0         | 0         |                | V/0    |
| CHL2626                       | GD III | Longyou 673     | Xinyi     | 2008L | V | 0         | 0         | 0         | 0         |                | V/0    |
| CHL2630                       | GD III | II You 084      | Gaozhou   | 2008L | V | 0         | 0         | 0         | 0         |                | V/0    |
| CHL2636                       | GD IV  | Bo II You 15    | Suixi     | 2008L | V | 0         | 0         | 0         | 0         |                | V/0    |
| <b>Hunan population (Σ60)</b> |        |                 |           |       |   | <b>23</b> | <b>23</b> | <b>21</b> | <b>21</b> | <b>23C+21J</b> |        |
| EHL0312                       | HN I   | Tefu No.7       | Taoyuan   | 2007  | V | 0         | 0         | 0         | 0         |                | V/0    |
| EHL0313                       | HN I   | Tefu No.7       | Taoyuan   | 2007  | V | 0         | 0         | 0         | 0         |                | V/0    |
| EHL0314                       | HN II  | Weiyao 402      | Anren     | 2007  | A | <b>1</b>  | 1         | 0         |           | ✓              | A/1C   |
| EHL0317                       | HN II  | Weiyao 402      | Anren     | 2007  | A | 0         | 0         | 1         | 1         | ✓              | A/1J   |
| EHL0319                       | HN II  | Liangyou 287    | Liling    | 2007  | A | <b>1</b>  | 1         | 1         | 1         | ✓✓             | A/1C_J |
| EHL0321                       | HN II  | V402            | Hengnan   | 2007  | A | <b>1</b>  | 1         | 0         | 0         | ✓              | A/1C   |
| EHL0323                       | HN II  | V233            | Hengdong  | 2007  | A | <b>1</b>  | 1         | 0         | 0         | ✓              | A/1C   |
| EHL0324                       | HN II  | I You 402       | Hengdong  | 2007  | A | <b>1</b>  | 1         | 0         | 0         | ✓              | A/1C   |
| EHL0326                       | HN II  | I You 402       | Hengnan   | 2007  | A | <b>1</b>  | 1         | 0         | 0         | ✓              | A/1C   |
| EHL0327                       | HN II  | Zhuliangyou 30  | Dongan    | 2007  | A | <b>1</b>  | 1         | 1         | 1         | ✓✓             | A/1C_J |
| EHL0329                       | HN II  | Douyuanyou 299  | Dongan    | 2007  | A | 0         | 0         | 1         | 1         | ✓              | A/1J   |
| EHL0330                       | HN II  | T You 99        | Dongan    | 2007  | A | 0         | 0         | 1         | 1         | ✓              | A/1J   |
| EHL0331                       | HN II  | Xianfeng 501    | Dongan    | 2007  | V | 0         | 0         | 0         | 0         |                | V/0    |
| EHL0337                       | HN II  | Jinyou 71       | Dongan    | 2007  | V | 0         | 0         | 0         | 0         |                | V/0    |
| EHL0338                       | HN II  | Jinyou 898      | Dongan    | 2007  | A | <b>1</b>  | 1         | 1         | 1         | ✓✓             | A/1C_J |
| EHL0339                       | HN II  | Nongping 001    | Dongan    | 2007  | V | 0         | 0         | 0         | 0         |                | V/0    |
| EHL0340                       | HN II  | Weiyao 507      | Dongan    | 2007  | A | 0         | 0         | 1         | 1         | ✓              | A/1J   |
| EHL0341                       | HN II  | Weiyao 298      | Dongan    | 2007  | A | <b>1</b>  | 1         | 0         | 0         | ✓              | A/1C   |
| EHL0342                       | HN II  | Weiyao 463      | Dongan    | 2007  | A | 0         | 0         | 1         | 1         | ✓              | A/1J   |
| EHL0345                       | HN II  | T You 213       | Dongan    | 2007  | V | 0         | 0         | 0         | 0         |                | V/0    |
| EHL0346                       | HN II  | T You 103       | Dongan    | 2007  | A | <b>1</b>  | 1         | 0         | 0         | ✓              | A/1C   |
| EHL0347                       | HN II  | T You 404       | Dongan    | 2007  | V | 0         | 0         | 0         | 0         |                | V/0    |
| EHL0349                       | HN II  | Jinyou 402      | Dongan    | 2007  | V | 0         | 0         | 0         | 0         |                | V/0    |
| EHL0350                       | HN II  | Xianfeng No.1   | Dongan    | 2007  | V | 0         | 0         | 0         | 0         |                | V/0    |
| EHL0353                       | HN II  | Nongfengyou 909 | Dongan    | 2007  | A | 0         | 0         | 1         | 1         | ✓              | A/1J   |

|         |        |                    |          |      |   |   |   |   |   |    |        |
|---------|--------|--------------------|----------|------|---|---|---|---|---|----|--------|
| EHL0354 | HN II  | Jinyou 821         | Dongan   | 2007 | A | 0 | 0 | 1 | 1 | ✓  | A/1J   |
| EHL0355 | HN II  | Weiyu 463          | Dongan   | 2007 | A | 0 | 0 | 1 | 1 | ✓  | A/1J   |
| EHL0356 | HN II  | Zhongyou No.1      | Dongan   | 2007 | A | 1 | 1 | 1 | 1 | ✓✓ | A/1C_J |
| EHL0360 | HN II  | Zhongyou No.1      | Dongan   | 2007 | A | 1 | 1 | 1 | 1 | ✓✓ | A/1C_J |
| EHL0361 | HN II  | Zhuliangyou 02     | Dongan   | 2007 | A | 1 | 1 | 1 | 1 | ✓✓ | A/1C_J |
| EHL0363 | HN II  | Xiangnuo           | Dongan   | 2007 | A | 1 | 1 | 0 | 0 | ✓  | A/1C   |
| EHL0364 | HN II  | T You 706          | Dongan   | 2007 | A | 0 | 0 | 1 | 1 | ✓  | A/1J   |
| EHL0365 | HN II  | Zhongyou 493       | Dongan   | 2007 | V | 0 | 0 | 0 | 0 |    | V/0    |
| EHL0367 | HN II  | Jinyou 463         | Dongan   | 2007 | V | 0 | 0 | 0 | 0 |    | V/0    |
| EHL0368 | HN II  | Zhuliangyou 83     | Dongan   | 2007 | V | 0 | 0 | 0 | 0 |    | V/0    |
| EHL0369 | HN III | Jinyou 899         | Daoxian  | 2007 | V | 0 | 0 | 0 | 0 |    | V/0    |
| EHL0370 | HN III | Jinyou 463         | Daoxian  | 2007 | A | 1 | 1 | 1 | 1 | ✓✓ | A/1C_J |
| EHL0372 | HN III | Nuogu              | Daoxian  | 2007 | V | 0 | 0 | 0 | 0 |    | V/0    |
| EHL0373 | HN III | Jinyou 463         | Daoxian  | 2007 | A | 1 | 1 | 1 | 1 | ✓✓ | A/1C_J |
| EHL0374 | HN III | Shennongdao 101    | Daoxian  | 2007 | A | 1 | 1 | 1 | 1 | ✓✓ | A/1C_J |
| EHL0377 | HN I   | Jing No.5          | Yiyang   | 2007 | A | 1 | 1 | 0 | 0 | ✓  | A/1-C  |
| EHL0378 | HN I   | Wanxiang No. 13    | Taojiang | 2007 | A | 1 | 1 | 1 | 1 | ✓✓ | A/1C_J |
| EHL0379 | HN I   | Pin No. 3          | Taojiang | 2007 | V | 0 | 0 | 0 | 0 |    | V/0    |
| EHL0380 | HN I   | Wannuo             | Yiyang   | 2007 | V | 0 | 0 | 0 | 0 |    | V/0    |
| EHL0381 | HN I   | Wannuo             | Yiyang   | 2007 | V | 0 | 0 | 0 | 0 |    | V/0    |
| EHL0382 | HN I   | Nuogu              | YueYang  | 2007 | A | 1 | 1 | 1 | 1 | ✓✓ | A/1C_J |
| EHL0385 | HN II  | II You 58          | Liuyang  | 2007 | V | 0 | 0 | 0 | 0 |    | V/0    |
| EHL0386 | HN II  | Minghui 63         | Liuyang  | 2007 | V | 0 | 0 | 0 | 0 |    | V/0    |
| EHL0387 | HN II  | II You 838         | Liuyang  | 2007 | V | 0 | 0 | 0 | 0 |    | V/0    |
| EHL0393 | HN II  | Y NO. 232          | Youxian  | 2007 | A | 1 | 1 | 0 | 0 | ✓  | A/1C   |
| EHL0394 | HN II  | Xinshanyou 64      | Anren    | 2007 | A | 1 | 1 | 1 | 1 | ✓✓ | A/1C_J |
| EHL0395 | HN IV  | Zhongyou 288       | Huaihua  | 2007 | V | 0 | 0 | 0 | 0 |    | V/0    |
| EHL0963 | HN I   | Xianghuayou No. 7  | Taojiang | 2008 | A | 1 | 1 | 0 | 0 | ✓  | A/1C   |
| EHL0975 | HN I   | Fuyou II           | Taojiang | 2008 | V | 0 | 0 | 0 | 0 |    | V/0    |
| EHL0979 | HN II  | Mixiang No.1       | Changsha | 2008 | V | 0 | 0 | 0 | 0 |    | V/0    |
| EHL0982 | HN II  | Xiangwanxian No.17 | Changsha | 2008 | V | 0 | 0 | 0 | 0 |    | V/0    |
| EHL0987 | HN II  | Chaojidao 527      | Zhuzhou  | 2008 | V | 0 | 0 | 0 | 0 |    | V/0    |

|                                 |        |                    |         |      |   |    |    |   |   |        |      |
|---------------------------------|--------|--------------------|---------|------|---|----|----|---|---|--------|------|
| EHL0988                         | HN II  | Chaojidao 527      | Zhuzhou | 2008 | V | 0  | 0  | 0 | 0 |        | V/0  |
| EHL0989                         | HN II  | Xiangwanxian No.13 | Zhuzhou | 2008 | V | 0  | 0  | 0 | 0 |        | V/0  |
| EHL0991                         | HN II  | Xiangzaoxian 24    | Liling  | 2008 | V | 0  | 0  | 0 | 0 |        | V/0  |
| <b>Guizhou population (Σ60)</b> |        |                    |         |      |   | 17 | 17 | 5 | 5 | 17C+5J |      |
| CHL583                          | GZ III | Chujing            | Panxian | 2001 | A | 1  | 1  | 0 | 0 | ✓      | A/1C |
| CHL584                          | GZ I   | Bendinuo           | Danzhai | 2001 | A | 1  | 1  | 0 | 0 | ✓      | A/1C |
| CHL586                          | GZ VI  | Baikejing          | Nayong  | 2001 | A | 1  | 1  | 0 | 0 | ✓      | A/1C |
| CHL588                          | GZ I   | Aizinuo            | Huaxi   | 2001 | V | 0  | 0  | 0 | 0 |        | V/0  |
| CHL589                          | GZ I   | K You 5            | Dushan  | 2001 | V | 0  | 0  | 0 | 0 |        | V/0  |
| CHL590                          | GZ I   | Bendigaonuo        | Huaxi   | 2001 | A | 1  | 1  | 0 | 0 | ✓      | A/1C |
| CHL591                          | GZ I   | Nuodao             | Dushan  | 2001 | A | 1  | 1  | 0 | 0 | ✓      | A/1C |
| CHL592                          | GZ I   | Nuodao             | Xifeng  | 2001 | V | 0  | 0  | 0 | 0 |        | V/0  |
| CHL593                          | GZ III | Nuodao             | Panxian | 2001 | V | 0  | 0  | 0 | 0 |        | V/0  |
| CHL594                          | GZ I   | Nuodao             | Xifeng  | 2001 | V | 0  | 0  | 0 | 0 |        | V/0  |
| CHL597                          | GZ VI  | Baikejing          | Nayong  | 2001 | A | 1  | 1  | 0 | 0 | ✓      | A/1C |
| CHL598                          | GZ VI  | Bijing 37          | Nayong  | 2001 | V | 0  | 0  | 0 | 0 |        | V/0  |
| CHL599                          | GZ III | Nuodao             | Xingren | 2001 | A | 1  | 1  | 0 | 0 | ✓      | A/1C |
| CHL601                          | GZ III | Gangyou 527        | Xingyi  | 2001 | V | 0  | 0  | 0 | 0 |        | V/0  |
| CHL602                          | GZ I   | Xieyou No.6        | Dushan  | 2001 | V | 0  | 0  | 0 | 0 |        | V/0  |
| CHL605                          | GZ III | Gangyou 725        | Xingyi  | 2001 | V | 0  | 0  | 0 | 0 |        | V/0  |
| CHL610                          | GZ I   | D You 68           | Kaiyang | 2001 | V | 0  | 0  | 0 | 0 |        | V/0  |
| CHL611                          | GZ I   | Jinwan 3           | Huaxi   | 2001 | A | 0  | 0  | 1 | 1 | ✓      | A/1J |
| CHL612                          | GZ VI  | Maomaonuo          | Nayong  | 2001 | A | 1  | 1  | 0 | 0 | ✓      | A/1C |
| CHL614                          | GZ VI  | 800 Li             | Nayong  | 2001 | V | 0  | 0  | 0 | 0 |        | V/0  |
| CHL615                          | GZ VI  | 84-15              | Nayong  | 2001 | A | 1  | 1  | 0 | 0 | ✓      | A/1C |
| CHL616                          | GZ VI  | 800 Li             | Nayong  | 2001 | V | 0  | 0  | 0 | 0 |        | V/0  |
| CHL617                          | GZ VI  | 84-15              | Nayong  | 2001 | A | 1  | 1  | 0 | 0 | ✓      | A/1C |
| CHL618                          | GZ III | Gangyou 725        | Xingren | 2001 | V | 0  | 0  | 0 | 0 |        | V/0  |
| CHL621                          | GZ I   | Feiduo No.1        | Zunyi   | 2001 | V | 0  | 0  | 0 | 0 |        | V/0  |
| CHL622                          | GZ I   | Nuodao             | Xiuwen  | 2001 | V | 0  | 0  | 0 | 0 |        | V/0  |
| CHL624                          | GZ I   | Xinxiangyou 80     | Xiuwen  | 2001 | A | 0  | 0  | 1 | 1 | ✓      | A/1J |
| CHL625                          | GZ II  | Unkown             | Tianzhu | 2001 | A | 0  | 0  | 1 | 1 | ✓      | A/1J |

|        |        |                |           |      |   |   |   |   |   |    |        |
|--------|--------|----------------|-----------|------|---|---|---|---|---|----|--------|
| CHL626 | GZ I   | Nuodao         | Kaiyang   | 2001 | A | 1 | 1 | 0 | 0 | ✓  | A/1C   |
| CHL627 | GZ I   | Bendinuo       | Qingzhen  | 2001 | A | 1 | 1 | 0 | 0 | ✓  | A/1C   |
| CHL629 | GZ IV  | Liangyou 6078  | Liping    | 2001 | V | 0 | 0 | 0 | 0 |    | V/0    |
| CHL630 | GZ III | Manbaxiang     | Xingyi    | 2001 | V | 0 | 0 | 0 | 0 |    | V/0    |
| CHL639 | GZ III | Gangyou 725    | Xingren   | 2001 | V | 0 | 0 | 0 | 0 |    | V/0    |
| CHL640 | GZ III | Guihuanuo      | Xingyi    | 2001 | V | 0 | 0 | 0 | 0 |    | V/0    |
| CHL641 | GZ I   | Xinxiangyou 80 | Xiuwen    | 2001 | A | 0 | 0 | 1 | 1 | ✓  | A/1J   |
| CHL643 | GZ I   | Unkown         | Yuqing    | 2001 | V | 0 | 0 | 0 | 0 |    | V/0    |
| CHL644 | GZ II  | 79-16          | Sinan     | 2001 | A | 1 | 1 | 0 | 0 | ✓  | A/1C   |
| CHL645 | GZ II  | Baiyangnuo     | Sinan     | 2001 | A | 1 | 1 | 0 | 0 | ✓  | A/1C   |
| CHL646 | GZ II  | Gangyou 22     | Sinan     | 2001 | V | 0 | 0 | 0 | 0 |    | V/0    |
| CHL648 | GZ II  | Gangyou 22     | Sinan     | 2001 | V | 0 | 0 | 0 | 0 |    | V/0    |
| CHL649 | GZ II  | Baiyangnuo     | Sinan     | 2001 | A | 1 | 1 | 0 | 0 | ✓  | A/1C   |
| CHL650 | GZ I   | K77            | Zunyi     | 2001 | V | 0 | 0 | 0 | 0 |    | V/0    |
| CHL652 | GZ I   | K77            | Zunyi     | 2001 | A | 1 | 1 | 1 | 1 | ✓✓ | A/1C_J |
| CHL653 | GZ II  | 79-16          | Sinan     | 2001 | V | 0 | 0 | 0 | 0 |    | V/0    |
| CHL654 | GZ I   | Feiduo No.1    | Zunyi     | 2001 | V | 0 | 0 | 0 | 0 |    | V/0    |
| CHL655 | GZ VI  | Maomaonuo      | Nayong    | 2001 | A | 1 | 1 | 0 | 0 | ✓  | A/1C   |
| CHL656 | GZ I   | Liangyou 63    | Taijiang  | 2001 | V | 0 | 0 | 0 | 0 |    | V/0    |
| CHL657 | GZ II  | Shanyou 73     | Jianhe    | 2001 | V | 0 | 0 | 0 | 0 |    | V/0    |
| CHL658 | GZ I   | Teyou 63       | Dushan    | 2001 | V | 0 | 0 | 0 | 0 |    | V/0    |
| CHL659 | GZ I   | Xieyou 63      | Dushan    | 2001 | V | 0 | 0 | 0 | 0 |    | V/0    |
| CHL661 | GZ I   | Shanyou 63     | Huangping | 2001 | V | 0 | 0 | 0 | 0 |    | V/0    |
| CHL662 | GZ III | D You 527      | Xingyi    | 2001 | V | 0 | 0 | 0 | 0 |    | V/0    |
| CHL665 | GZ III | Gangyou        | Xingyi    | 2001 | V | 0 | 0 | 0 | 0 |    | V/0    |
| CHL666 | GZ I   | Shanyou 63     | Kaiyang   | 2001 | V | 0 | 0 | 0 | 0 |    | V/0    |
| CHL667 | GZ III | Teyou 559      | Xingyi    | 2001 | V | 0 | 0 | 0 | 0 |    | V/0    |
| CHL668 | GZ I   | Jinyou 63      | Kaiyang   | 2001 | V | 0 | 0 | 0 | 0 |    | V/0    |
| CHL670 | GZ I   | Gangyou 22     | Dushan    | 2001 | V | 0 | 0 | 0 | 0 |    | V/0    |
| CHL672 | GZ IV  | Shanyou 63     | Congjiang | 2001 | V | 0 | 0 | 0 | 0 |    | V/0    |
| CHL674 | GZ III | Guihuanuo      | Xingyi    | 2001 | V | 0 | 0 | 0 | 0 |    | V/0    |
| CHL675 | GZ III | Kekexiang      | Xingyi    | 2001 | V | 0 | 0 | 0 | 0 |    | V/0    |

| Liaoning population ( $\Sigma 60$ ) |        |               |           |      |   | 24 | 24 | 0 | 0 | 24C+0J |      |
|-------------------------------------|--------|---------------|-----------|------|---|----|----|---|---|--------|------|
| EHL0396                             | LN I   | Minxi 12      | Zhuanghe  | 2006 | V | 0  | 0  | 0 | 0 |        | V/0  |
| EHL0397                             | LN I   | Chenhong 59   | Zhuanghe  | 2006 | A | 1  | 1  | 0 | 0 | ✓      | A/1C |
| EHL0400                             | LN I   | Lige          | Zhuanghe  | 2006 | V | 0  | 0  | 0 | 0 |        | V/0  |
| EHL0409                             | LN I   | Yanjing 167   | Donggang  | 2006 | V | 0  | 0  | 0 | 0 |        | V/0  |
| EHL0412                             | LN I   | Huanghai No.6 | Donggang  | 2006 | V | 0  | 0  | 0 | 0 |        | V/0  |
| EHL0431                             | LN I   | Liaodan 203   | Donggang  | 2006 | V | 0  | 0  | 0 | 0 |        | V/0  |
| EHL0433                             | LN I   | Liaohan 109   | Donggang  | 2006 | A | 1  | 1  | 0 | 0 | ✓      | A/1C |
| EHL0444                             | LN II  | Chenhong 59   | Pulandian | 2006 | V | 0  | 0  | 0 | 0 |        | V/0  |
| EHL0445                             | LN II  | Minxi 12      | Pulandian | 2006 | A | 1  | 1  | 0 | 0 | ✓      | A/1C |
| EHL0446                             | LN II  | Gangyu 129    | Pulandian | 2006 | A | 1  | 1  | 0 | 0 | ✓      | A/1C |
| EHL0447                             | LN II  | Koshihikari   | Pulandian | 2006 | A | 1  | 1  | 0 | 0 | ✓      | A/1C |
| EHL0468                             | LN II  | Maoyang No.3  | Fengchen  | 2006 | V | 0  | 0  | 0 | 0 |        | V/0  |
| EHL0470                             | LN II  | Maoyang 3     | Fengchen  | 2006 | V | 0  | 0  | 0 | 0 |        | V/0  |
| EHL0472                             | LN II  | Panjin 78-2   | Fengchen  | 2006 | A | 1  | 1  | 0 | 0 | ✓      | A/1C |
| EHL0474                             | LN II  | Chenhe No.1   | Fengchen  | 2006 | A | 1  | 1  | 0 | 0 | ✓      | A/1C |
| EHL0484                             | LN II  | Yuanfeng No.9 | Fushun    | 2006 | V | 0  | 0  | 0 | 0 |        | V/0  |
| EHL0486                             | LN II  | Fuyou 504     | Fushun    | 2006 | V | 0  | 0  | 0 | 0 |        | V/0  |
| EHL0489                             | LN II  | Shennong 0705 | Fushun    | 2006 | A | 1  | 1  | 0 | 0 | ✓      | A/1C |
| EHL0491                             | LN II  | Jijing 88     | Fushun    | 2006 | A | 1  | 1  | 0 | 0 | ✓      | A/1C |
| EHL0492                             | LN II  | Xin No.2      | Fushun    | 2006 | V | 0  | 0  | 0 | 0 |        | V/0  |
| EHL0493                             | LN II  | Shennong 315  | Fushun    | 2006 | V | 0  | 0  | 0 | 0 |        | V/0  |
| EHL0496                             | LN II  | Su 01-18      | Dashiqiao | 2006 | A | 1  | 1  | 0 | 0 | ✓      | A/1C |
| EHL0498                             | LN II  | Yanfeng       | Dashiqiao | 2006 | A | 1  | 1  | 0 | 0 | ✓      | A/1C |
| EHL0499                             | LN II  | Yanfeng 47-12 | Dashiqiao | 2006 | A | 1  | 1  | 0 | 0 | ✓      | A/1C |
| EHL0500                             | LN III | Chenhe No.1   | Panjin    | 2006 | A | 1  | 1  | 0 | 0 | ✓      | A/1C |
| EHL0503                             | LN III | Maoyang No.3  | Panjin    | 2006 | A | 1  | 1  | 0 | 0 | ✓      | A/1C |
| EHL0505                             | LN III | Liaohe 12     | Panjin    | 2006 | A | 1  | 1  | 0 | 0 | ✓      | A/1C |
| EHL0509                             | LN III | Yanjing 228   | Panjin    | 2006 | V | 0  | 0  | 0 | 0 |        | V/0  |
| EHL0515                             | LN III | Liaohe No.1   | Panjin    | 2006 | A | 1  | 1  | 0 | 0 | ✓      | A/1C |
| EHL0517                             | LN III | Huadan 995    | Shenyang  | 2006 | A | 1  | 1  | 0 | 0 | ✓      | A/1C |
| EHL0519                             | LN III | Huadan 995    | Tieling   | 2006 | A | 1  | 1  | 0 | 0 | ✓      | A/1C |

|                                  |       |                |          |      |   |   |   |   |   |       |      |
|----------------------------------|-------|----------------|----------|------|---|---|---|---|---|-------|------|
| EHL0879                          | LN I  | Liaoxing No.1  | Dandong  | 2007 | V | 0 | 0 | 0 | 0 |       | V/0  |
| EHL0880                          | LN I  | Gangyu No.2    | Dandong  | 2007 | V | 0 | 0 | 0 | 0 |       | V/0  |
| EHL0882                          | LN I  | Chenhe No.1    | Dandong  | 2007 | V | 0 | 0 | 0 | 0 |       | V/0  |
| EHL0883                          | LN I  | Maoyang No.5   | Dandong  | 2007 | A | 1 | 1 | 0 | 0 | ✓     | A/1C |
| EHL0885                          | LN I  | Liaojing No.9  | Dandong  | 2007 | A | 1 | 1 | 0 | 0 | ✓     | A/1C |
| EHL0916                          | LN II | Heixiangdao    | Dalian   | 2007 | V | 0 | 0 | 0 | 0 |       | V/0  |
| EHL0917                          | LN II | Zhuangyan No.8 | Dalian   | 2007 | V | 0 | 0 | 0 | 0 |       | V/0  |
| EHL0918                          | LN II | Koshihikari    | Dalian   | 2007 | A | 1 | 1 | 0 | 0 | ✓     | A/1C |
| EHL0919                          | LN II | Yanfeng 47     | Dalian   | 2007 | V | 0 | 0 | 0 | 0 |       | V/0  |
| EHL0921                          | LN II | Gangyuan No.8  | Dalian   | 2007 | V | 0 | 0 | 0 | 0 |       | V/0  |
| EHL0922                          | LN II | Liaonong 06-7  | Qinyuan  | 2007 | V | 0 | 0 | 0 | 0 |       | V/0  |
| EHL0925                          | LN II | Fuxing 90      | Qinyuan  | 2007 | V | 0 | 0 | 0 | 0 |       | V/0  |
| EHL0926                          | LN II | Jijing 88      | Qinyuan  | 2007 | V | 0 | 0 | 0 | 0 |       | V/0  |
| EHL0928                          | LN II | Liaonong 06-7  | Xinbin   | 2007 | V | 0 | 0 | 0 | 0 |       | V/0  |
| EHL0929                          | LN II | Fu 9906        | Xinbin   | 2007 | V | 0 | 0 | 0 | 0 |       | V/0  |
| EHL0930                          | LN II | Xinyi 3        | Xinbin   | 2007 | V | 0 | 0 | 0 | 0 |       | V/0  |
| EHL0932                          | LN II | Xinyu No.3     | Xinbin   | 2007 | V | 0 | 0 | 0 | 0 |       | V/0  |
| EHL0934                          | LN II | Xinyu 4        | Xinbin   | 2008 | V | 0 | 0 | 0 | 0 |       | V/0  |
| EHL0935                          | LN II | Jijing 88      | Xinbin   | 2007 | A | 1 | 1 | 0 | 0 | ✓     | A/1C |
| EHL0936                          | LN II | Shendao 37     | Xifeng   | 2007 | V | 0 | 0 | 0 | 0 |       | V/0  |
| EHL0937                          | LN II | Shennong 315   | Xifeng   | 2007 | V | 0 | 0 | 0 | 0 |       | V/0  |
| EHL0939                          | LN II | Xinyi No.3     | Xifeng   | 2007 | V | 0 | 0 | 0 | 0 |       | V/0  |
| EHL0940                          | LN II | Fuxing 90      | Xifeng   | 2007 | V | 0 | 0 | 0 | 0 |       | V/0  |
| EHL0941                          | LN II | Xinyi No.3     | Kaiyuan  | 2007 | V | 0 | 0 | 0 | 0 |       | V/0  |
| EHL0942                          | LN II | Shennong 9903  | Kaiyuan  | 2007 | A | 1 | 1 | 0 | 0 | ✓     | A/1C |
| EHL0943                          | LN II | Huadan No.995  | Kaiyuan  | 2007 | V | 0 | 0 | 0 | 0 |       | V/0  |
| EHL0944                          | LN II | Fuxing 90      | Kaiyuan  | 2007 | V | 0 | 0 | 0 | 0 |       | V/0  |
| EHL0961                          | LN IV | Chenhe No.1    | Suizhong | 2007 | V | 0 | 0 | 0 | 0 |       | V/0  |
| EHL0962                          | LN IV | Yanjing 218    | Suizhong | 2007 | A | 1 | 1 | 0 | 0 | ✓     | A/1C |
| Jilin population ( $\Sigma 60$ ) |       |                |          |      |   | 8 | 8 | 0 | 0 | 8C+0J |      |
| CHL678                           | JL I  | Tong 31        | Yongji   | 2003 | V | 0 | 0 | 0 | 0 |       | V/0  |
| CHL680                           | JL I  | Ji 04          | Yongji   | 2003 | V | 0 | 0 | 0 | 0 |       | V/0  |



|        |       |                 |          |      |   |   |   |   |   |   |      |
|--------|-------|-----------------|----------|------|---|---|---|---|---|---|------|
| CHL682 | JL I  | Tong 313        | Yongji   | 2003 | V | 0 | 0 | 0 | 0 |   | V/0  |
| CHL684 | JL I  | Fengyou 201     | Yongji   | 2003 | V | 0 | 0 | 0 | 0 |   | V/0  |
| CHL686 | JL I  | Pingjing 1      | Yongji   | 2003 | V | 0 | 0 | 0 | 0 |   | V/0  |
| CHL688 | JL I  | Jiu 01 C 6      | Yongji   | 2003 | V | 0 | 0 | 0 | 0 |   | V/0  |
| CHL690 | JL I  | Changbai 9      | Shulan   | 2003 | A | 1 | 1 | 0 | 0 | ✓ | A/1C |
| CHL692 | JL I  | Dongnong V 7    | Shulan   | 2003 | V | 0 | 0 | 0 | 0 |   | V/0  |
| CHL693 | JL I  | Yan 312         | Shulan   | 2003 | V | 0 | 0 | 0 | 0 |   | V/0  |
| CHL695 | JL I  | Songjing 6      | Shulan   | 2003 | V | 0 | 0 | 0 | 0 |   | V/0  |
| CHL697 | JL I  | 301             | Shulan   | 2003 | V | 0 | 0 | 0 | 0 |   | V/0  |
| CHL699 | JL I  | Tongyu 12       | Shulan   | 2003 | V | 0 | 0 | 0 | 0 |   | V/0  |
| CHL700 | JL I  | Wuyou 1         | Shulan   | 2003 | V | 0 | 0 | 0 | 0 |   | V/0  |
| CHL701 | JL I  | 99-35           | Panshi   | 2003 | V | 0 | 0 | 0 | 0 |   | V/0  |
| CHL702 | JL I  | Tongfeng No. 3  | Panshi   | 2003 | V | 0 | 0 | 0 | 0 |   | V/0  |
| CHL703 | JL I  | Ji 01-3628      | Panshi   | 2003 | V | 0 | 0 | 0 | 0 |   | V/0  |
| CHL704 | JL I  | Pingjing No. 2  | Panshi   | 2003 | V | 0 | 0 | 0 | 0 |   | V/0  |
| CHL705 | JL I  | Chang 6         | Panshi   | 2003 | V | 0 | 0 | 0 | 0 |   | V/0  |
| CHL708 | JL IV | Tongjing 612    | Jiaohe   | 2003 | V | 0 | 0 | 0 | 0 |   | V/0  |
| CHL710 | JL IV | Yan 313         | Jiaohe   | 2003 | V | 0 | 0 | 0 | 0 |   | V/0  |
| CHL712 | JL IV | Changbai 9      | Jiaohe   | 2003 | V | 0 | 0 | 0 | 0 |   | V/0  |
| CHL713 | JL IV | Jinlang No. 1   | Jiaohe   | 2003 | V | 0 | 0 | 0 | 0 |   | V/0  |
| CHL714 | JL IV | Wuyou C         | Jiaohe   | 2003 | V | 0 | 0 | 0 | 0 |   | V/0  |
| CHL719 | JL IV | 124             | Jiaohe   | 2003 | A | 1 | 1 | 0 | 0 | ✓ | A/1C |
| CHL718 | JL IV | Changlixiang 12 | Jiaohe   | 2003 | V | 0 | 0 | 0 | 0 |   | V/0  |
| CHL721 | JL I  | Jiu 01 D 13     | Jilin    | 2003 | V | 0 | 0 | 0 | 0 |   | V/0  |
| CHL722 | JL I  | Ji T620-4       | Jilin    | 2003 | V | 0 | 0 | 0 | 0 |   | V/0  |
| CHL724 | JL I  | T 02            | Jilin    | 2003 | V | 0 | 0 | 0 | 0 |   | V/0  |
| CHL725 | JL I  | Tongjing 790 B  | Jilin    | 2003 | V | 0 | 0 | 0 | 0 |   | V/0  |
| CHL730 | JL I  | Tongnian 3      | Jilin    | 2003 | V | 0 | 0 | 0 | 0 |   | V/0  |
| CHL731 | JL I  | Tongyu 308      | Jilin    | 2003 | V | 0 | 0 | 0 | 0 |   | V/0  |
| CHL733 | JL I  | Tongnian 23     | Meihekou | 2003 | V | 0 | 0 | 0 | 0 |   | V/0  |
| CHL734 | JL I  | Tong 3158       | Liuhe    | 2003 | V | 0 | 0 | 0 | 0 |   | V/0  |
| CHL735 | JL I  | Daliwang        | Liuhe    | 2003 | V | 0 | 0 | 0 | 0 |   | V/0  |

|                                      |         |                 |             |      |   |   |   |   |   |       |      |
|--------------------------------------|---------|-----------------|-------------|------|---|---|---|---|---|-------|------|
| CHL736                               | JL I    | Unknown         | Lishu       | 2003 | V | 0 | 0 | 0 | 0 |       | V/0  |
| CHL737                               | JL I    | Unknown         | Yitong      | 2003 | V | 0 | 0 | 0 | 0 |       | V/0  |
| CHL739                               | JL I    | 182             | Jiutai      | 2003 | V | 0 | 0 | 0 | 0 |       | V/0  |
| CHL740                               | JL I    | 183             | Jiutai      | 2003 | V | 0 | 0 | 0 | 0 |       | V/0  |
| CHL741                               | JL I    | No. 55          | Jiutai      | 2003 | A | 1 | 1 | 0 | 0 | ✓     | A/1C |
| CHL742                               | JL I    | No. 55          | Jiutai      | 2003 | A | 1 | 1 | 0 | 0 | ✓     | A/1C |
| CHL743                               | JL I    | No. 52          | Jiutai      | 2003 | V | 0 | 0 | 0 | 0 |       | V/0  |
| CHL744                               | JL I    | Tong 793        | Dehui       | 2003 | V | 0 | 0 | 0 | 0 |       | V/0  |
| CHL745                               | JL I    | Tong 190        | Dehui       | 2003 | V | 0 | 0 | 0 | 0 |       | V/0  |
| CHL748                               | JL I    | Changxiangsi    | Dongfeng    | 2003 | V | 0 | 0 | 0 | 0 |       | V/0  |
| CHL749                               | JL I    | Tongjing 769    | Dongfeng    | 2003 | A | 1 | 1 | 0 | 0 | ✓     | A/1C |
| CHL750                               | JL I    | 307             | Dongfeng    | 2003 | V | 0 | 0 | 0 | 0 |       | V/0  |
| CHL751                               | JL I    | Tongyin 58      | Dongfeng    | 2003 | V | 0 | 0 | 0 | 0 |       | V/0  |
| CHL752                               | JL I    | Zupei 11        | Dongfeng    | 2003 | V | 0 | 0 | 0 | 0 |       | V/0  |
| CHL754                               | JL I    | Chaochan 2      | Gongzhuling | 2003 | V | 0 | 0 | 0 | 0 |       | V/0  |
| CHL755                               | JL I    | Unknown         | Yitong      | 2003 | V | 0 | 0 | 0 | 0 |       | V/0  |
| CHL756                               | JL I    | Xueguang        | Yongji      | 2002 | V | 0 | 0 | 0 | 0 |       | V/0  |
| CHL757                               | JL IV   | Unknown         | Jiaohe      | 2002 | V | 0 | 0 | 0 | 0 |       | V/0  |
| CHL759                               | JL III  | Shangyu No. 397 | Helong      | 2002 | V | 0 | 0 | 0 | 0 |       | V/0  |
| CHL760                               | JL I    | Menggudao       | Meihekou    | 2002 | V | 0 | 0 | 0 | 0 |       | V/0  |
| CHL761                               | JL I    | 403             | Liuhe       | 2002 | V | 0 | 0 | 0 | 0 |       | V/0  |
| CHL762                               | JL I    | 112             | Liuhe       | 2002 | V | 0 | 0 | 0 | 0 |       | V/0  |
| CHL764                               | JL I    | Tong 458        | Dongfeng    | 2002 | A | 1 | 1 | 0 | 0 | ✓     | A/1C |
| CHL765                               | JL I    | Unknown         | Gongzhuling | 2002 | V | 0 | 0 | 0 | 0 |       | V/0  |
| CHL766                               | JL I    | Unknown         | Gongzhuling | 2002 | A | 1 | 1 | 0 | 0 | ✓     | A/1C |
| CHL767                               | JL I    | 939             | Baichen     | 2002 | A | 1 | 1 | 0 | 0 | ✓     | A/1C |
| <b>Heilongjiang population (Σ60)</b> |         |                 |             |      |   | 6 | 6 | 0 | 0 | 6C+0J |      |
| EHL0524                              | HLJ III | Songjing 7      | Zhaoyuan    | 2006 | A | 1 | 1 | 0 | 0 | ✓     | A/1C |
| EHL0527                              | HLJ II  | Kendao 10       | Anqin       | 2006 | A | 1 | 1 | 0 | 0 | ✓     | A/1C |
| EHL0532                              | HLJ II  | Song 98-131     | Anqin       | 2006 | V | 0 | 0 | 0 | 0 |       | V/0  |
| EHL0540                              | HLJ I   | Songjing 10     | Achen       | 2006 | V | 0 | 0 | 0 | 0 |       | V/0  |
| EHL0547                              | HLJ II  | Kendao 12       | Tonghe      | 2006 | V | 0 | 0 | 0 | 0 |       | V/0  |

|         |         |                 |            |      |   |   |   |   |   |   |      |
|---------|---------|-----------------|------------|------|---|---|---|---|---|---|------|
| EHL0555 | HLJ II  | Kuyuku 131      | Tonghe     | 2006 | V | 0 | 0 | 0 | 0 |   | V/0  |
| EHL0557 | HLJ II  | Suijing No.4    | Tonghe     | 2006 | V | 0 | 0 | 0 | 0 |   | V/0  |
| EHL0559 | HLJ II  | Dongnong 220    | Shangzhi   | 2006 | V | 0 | 0 | 0 | 0 |   | V/0  |
| EHL0560 | HLJ II  | Puyou 18        | Shangzhi   | 2006 | V | 0 | 0 | 0 | 0 |   | V/0  |
| EHL0567 | HLJ II  | Wuyoudao No.3   | Shangzhi   | 2006 | V | 0 | 0 | 0 | 0 |   | V/0  |
| EHL0568 | HLJ II  | Wuyoudao No.3   | Shangzhi   | 2006 | V | 0 | 0 | 0 | 0 |   | V/0  |
| EHL0570 | HLJ II  | Mudanjiang 19   | Shangzhi   | 2006 | V | 0 | 0 | 0 | 0 |   | V/0  |
| EHL0571 | HLJ II  | Kendao 10       | Shangzhi   | 2006 | V | 0 | 0 | 0 | 0 |   | V/0  |
| EHL0592 | HLJ II  | Shangyu 397     | Muling     | 2006 | V | 0 | 0 | 0 | 0 |   | V/0  |
| EHL0598 | HLJ III | Punian No.7     | Hulin      | 2006 | V | 0 | 0 | 0 | 0 |   | V/0  |
| EHL0599 | HLJ III | Kenjiandao No.6 | Hulin      | 2006 | V | 0 | 0 | 0 | 0 |   | V/0  |
| EHL0605 | HLJ III | Kuyuku 131      | Hulin      | 2006 | V | 0 | 0 | 0 | 0 |   | V/0  |
| EHL0611 | HLJ III | Kendao 12       | Hulin      | 2006 | V | 0 | 0 | 0 | 0 |   | V/0  |
| EHL0612 | HLJ II  | Kuyuku 131      | Mishan     | 2006 | V | 0 | 0 | 0 | 0 |   | V/0  |
| EHL0615 | HLJ II  | Suijing No.4    | Mishan     | 2006 | V | 0 | 0 | 0 | 0 |   | V/0  |
| EHL0619 | HLJ II  | Kuyuku 131      | Mishan     | 2006 | V | 0 | 0 | 0 | 0 |   | V/0  |
| EHL0622 | HLJ II  | Longdun 02-318  | Jidong     | 2006 | V | 0 | 0 | 0 | 0 |   | V/0  |
| EHL0624 | HLJ II  | Kuyuku 131      | Tangyuan   | 2006 | A | 1 | 1 | 0 | 0 | ✓ | A/1C |
| EHL0625 | HLJ II  | Kuyuku 131      | Huachuan   | 2006 | V | 0 | 0 | 0 | 0 |   | V/0  |
| EHL0629 | HLJ II  | Longdun 102     | Jiamusi    | 2006 | V | 0 | 0 | 0 | 0 |   | V/0  |
| EHL0633 | HLJ II  | Kuyuku 131      | Jiamusi    | 2006 | V | 0 | 0 | 0 | 0 |   | V/0  |
| EHL0634 | HLJ II  | Kuyuku 131      | Baoqin     | 2006 | V | 0 | 0 | 0 | 0 |   | V/0  |
| EHL0637 | HLJ II  | Kuyuku 131      | Jixian     | 2006 | A | 1 | 1 | 0 | 0 | ✓ | A/1C |
| EHL0750 | HLJ I   | Kuyuku 131      | Mudanjiang | 2006 | V | 0 | 0 | 0 | 0 |   | V/0  |
| EHL0755 | HLJ II  | Kuyuku 131      | Tangyuan   | 2006 | A | 1 | 1 | 0 | 0 | ✓ | A/1C |
| EHL0757 | HLJ II  | Kendao No.6     | Tangyuan   | 2006 | V | 0 | 0 | 0 | 0 |   | V/0  |
| EHL0764 | HLJ II  | Kendao No.11    | Qinan      | 2006 | V | 0 | 0 | 0 | 0 |   | V/0  |
| EHL0766 | HLJ II  | Kuyuku 131      | Qinan      | 2006 | V | 0 | 0 | 0 | 0 |   | V/0  |
| EHL0770 | HLJ II  | Longjing 17     | Qinan      | 2006 | V | 0 | 0 | 0 | 0 |   | V/0  |
| EHL0776 | HLJ I   | Kendao No.6     | Mudanjiang | 2006 | V | 0 | 0 | 0 | 0 |   | V/0  |
| EHL0779 | HLJ I   | Kuyuku 131      | Mudanjiang | 2006 | V | 0 | 0 | 0 | 0 |   | V/0  |
| EHL0781 | HLJ I   | Longjing 17     | Mudanjiang | 2006 | V | 0 | 0 | 0 | 0 |   | V/0  |

|                                               |         |               |              |      |       |   |   |   |   |       |      |
|-----------------------------------------------|---------|---------------|--------------|------|-------|---|---|---|---|-------|------|
| EHL0787                                       | HLJ III | Kenjiandao 13 | Jiansanjiang | 2006 | V     | 0 | 0 | 0 | 0 |       | V/0  |
| EHL0790                                       | HLJ III | Kuyuku 131    | Jiansanjiang | 2006 | V     | 0 | 0 | 0 | 0 |       | V/0  |
| EHL0794                                       | HLJ I   | Jite 639      | Wuchang      | 2007 | A     | 1 | 1 | 0 | 0 | ✓     | A/1C |
| EHL0798                                       | HLJ III | Songjing 3    | Zhaodong     | 2007 | V     | 0 | 0 | 0 | 0 |       | V/0  |
| EHL0801                                       | HLJ III | Songjing 12   | Zhaodong     | 2007 | V     | 0 | 0 | 0 | 0 |       | V/0  |
| EHL0814                                       | HLJ III | Jijing 106    | Zhaodong     | 2007 | V     | 0 | 0 | 0 | 0 |       | V/0  |
| EHL0821                                       | HLJ I   | Songjing 5    | Shuangchen   | 2007 | V     | 0 | 0 | 0 | 0 |       | V/0  |
| EHL0828                                       | HLJ I   | Songjing 6    | Shuangchen   | 2007 | V     | 0 | 0 | 0 | 0 |       | V/0  |
| EHL0830                                       | HLJ II  | Kendao 12     | Fangzheng    | 2007 | V     | 0 | 0 | 0 | 0 |       | V/0  |
| EHL0834                                       | HLJ I   | Menggudao     | Mudanjiang   | 2007 | V     | 0 | 0 | 0 | 0 |       | V/0  |
| EHL0836                                       | HLJ I   | Shangyu 397   | Mudanjiang   | 2007 | V     | 0 | 0 | 0 | 0 |       | V/0  |
| EHL0837                                       | HLJ I   | Shangyu 397   | Mudanjiang   | 2007 | V     | 0 | 0 | 0 | 0 |       | V/0  |
| EHL0838                                       | HLJ I   | Shangyu 397   | Mudanjiang   | 2007 | V     | 0 | 0 | 0 | 0 |       | V/0  |
| EHL0849                                       | HLJ II  | Kuyuku 131    | Muling       | 2007 | V     | 0 | 0 | 0 | 0 |       | V/0  |
| EHL0850                                       | HLJ II  | Kuyuku 131    | Muling       | 2007 | V     | 0 | 0 | 0 | 0 |       | V/0  |
| EHL0856                                       | HLJ II  | Puyou 9       | Muling       | 2007 | V     | 0 | 0 | 0 | 0 |       | V/0  |
| EHL0858                                       | HLJ II  | Puyou 9       | Muling       | 2007 | V     | 0 | 0 | 0 | 0 |       | V/0  |
| EHL0864                                       | HLJ II  | Unkown        | Jidong       | 2007 | V     | 0 | 0 | 0 | 0 |       | V/0  |
| EHL0866                                       | HLJ III | Longjing 17   | Hulin        | 2007 | V     | 0 | 0 | 0 | 0 |       | V/0  |
| EHL0868                                       | HLJ III | Kenjiandao 10 | Hulin        | 2007 | V     | 0 | 0 | 0 | 0 |       | V/0  |
| EHL0869                                       | HLJ III | Kenjiandao 10 | Hulin        | 2007 | V     | 0 | 0 | 0 | 0 |       | V/0  |
| EHL0870                                       | HLJ III | Longjing 17   | Hulin        | 2007 | V     | 0 | 0 | 0 | 0 |       | V/0  |
| EHL0871                                       | HLJ III | Longjing 17   | Hulin        | 2007 | V     | 0 | 0 | 0 | 0 |       | V/0  |
| <b>Outgroup (weed-derived isolates) (Σ17)</b> |         |               |              |      |       | 0 | 0 | 7 |   | 0C+7J |      |
| CHL325                                        | N/A     | Weed          | Guangzhou    | 2001 | ALL A | 0 | 0 | 0 | 0 |       | A/0  |
| CHL326                                        | N/A     | Weed          | Guangzhou    | 2001 | ALL A | 0 | 0 | 0 | 0 |       | A/0  |
| CHL329                                        | N/A     | Weed          | Guangzhou    | 2001 | ALL A | 0 | 0 | 0 | 0 |       | A/0  |
| CHL330                                        | N/A     | Weed          | Guangzhou    | 2001 | ALL A | 0 | 0 | 0 | 0 |       | A/0  |
| CHL331                                        | N/A     | Weed          | Guangzhou    | 2001 | ALL A | 0 | 0 | 0 | 0 |       | A/0  |
| CHL332                                        | N/A     | Weed          | Guangzhou    | 2001 | ALL A | 0 | 0 | 0 | 0 |       | A/0  |
| EHL2032                                       | N/A     | Weed          | Hainan       | 2016 | ALL A | 0 | 0 | 1 | 1 | ✓     | A/1J |
| EHL2034                                       | N/A     | Weed          | Hainan       | 2016 | ALL A | 0 | 0 | 1 | 1 | ✓     | A/1J |

|         |     |      |        |      |       |   |   |   |   |   |      |
|---------|-----|------|--------|------|-------|---|---|---|---|---|------|
| EHL2040 | N/A | Weed | Hainan | 2016 | ALL A | 0 | 0 | 1 | 1 | ✓ | A/1J |
| EHL2042 | N/A | Weed | Hainan | 2016 | ALL A | 0 | 0 | 1 | 1 | ✓ | A/1J |
| EHL2046 | N/A | Weed | Hainan | 2016 | ALL A | 0 | 0 | 0 | 0 |   | A/0  |
| EHL2051 | N/A | Weed | Hainan | 2017 | ALL A | 0 | 0 | 1 | 1 | ✓ | A/1J |
| EHL2052 | N/A | Weed | Hainan | 2017 | ALL A | 0 | 0 | 1 | 1 | ✓ | A/1J |
| EHL2053 | N/A | Weed | Hainan | 2017 | ALL A | 0 | 0 | 0 | 0 |   | A/0  |
| EHL2054 | N/A | Weed | Hainan | 2017 | ALL A | 0 | 0 | 0 | 0 |   | A/0  |
| EHL2055 | N/A | Weed | Hainan | 2017 | ALL A | 0 | 0 | 0 | 0 |   | A/0  |
| EHL2056 | N/A | Weed | Hainan | 2017 | ALL A | 0 | 0 | 1 | 1 | ✓ | A/1J |

<sup>a</sup> The rice-growing areas in the respective provinces, China, were adopted from Regionalization of Rice Cropping in China Edited in 1988 by China National Rice Research Institute, Hangzhou, China (45); and GD I and GD II mean #1 and #2 rice-growing areas, respectively, in Guangdong province and so on; N/A, data not available.

<sup>b</sup> 2008E and 2008L mean Early season (from March to July) and Late season (from July to November) in 2008, respectively and so on.

<sup>c</sup> Phenotype was derived from the *Pii* carrier, IRBLi-F5; A, avirulent; V, virulent; All A, those could not infect the *Pii* carrier, as well as several susceptible check cultivars thereby calling them as non-rice pathogen.

<sup>d</sup> PCR product-based genotypes 0, 1, respectively, indicate absence and presence of amplicon detected.

<sup>e</sup> Isolates marked by ✓ and ✓ ✓, respectively, indicate one and two copy/copies, those were subjected to resequencing.

<sup>f</sup> The integrated phenotype/genotypes, A/0 and V/0, respectively, indicate non-rice pathogen, and rice pathogen lack of *AvrPii*; A/1C, A/1J, and A1C\_J, respectively, the rice pathogen isolates carried C, J, and C\_J copy/copies those were avirulent on the *Pii* carrier.
