# Supplementary material for: The Lesson Learned from the Unique Evolutionary Story of Avirulence Gene AvrPii of Magnaporthe oryzae
Source: MDPI journal article supplement (doi:10.3390/genes14051065), 2023-05-11
Supplement: s1 [file s1]

**Table S4.** Comparison of evolutionary parameters of the *AvrPii* family among three *Mo* populations, of which parameters of the two populations previously reported were re-computed by the same approaches used in the current study

| Population                                           | <i>S</i> <sup>a</sup> | $\pi$ <sup>b</sup> | <i>D</i> * <sup>c</sup> | <i>F</i> *         | <i>Ka</i> <sup>d</sup> | <i>Ks</i> <sup>e</sup> | <i>Ka/Ks</i> |
|------------------------------------------------------|-----------------------|--------------------|-------------------------|--------------------|------------------------|------------------------|--------------|
| <b>All <i>AvrPii</i> (the current study)</b>         |                       |                    |                         |                    |                        |                        |              |
| Entire coding region                                 | 20                    | 0.037              | 1.74 <sup>β</sup>       | 2.65 <sup>β</sup>  | 193.8                  | 357.6                  | 0.54         |
| Non-signal peptide region                            | 18                    | 0.045              | 1.68 <sup>α</sup>       | 2.59 <sup>β</sup>  | 246.8                  | 434.8                  | 0.57         |
| Signal peptide region                                | 2                     | 0.013              | 0.68                    | 1.11               | 54.9                   | 166.0                  | 0.33         |
| <b>All <i>AvrPii</i> (Lu et al. 2019)</b>            |                       |                    |                         |                    |                        |                        |              |
| Entire coding region                                 | 15                    | 0.013              | 1.58 <sup>α</sup>       | 1.05               | 19.80                  | 22.39                  | 0.88         |
| Non-signal peptide region                            | 14                    | 0.017              | 1.55 <sup>α</sup>       | 1.04               | 24.97                  | 31.48                  | 0.79         |
| Signal peptide region                                | 1                     | 0.003              | 0.54                    | 0.34               | 5.98                   | 0                      | Ka>Ks        |
| <b>All <i>AvrPii</i> (Sirisathaworn et al. 2017)</b> |                       |                    |                         |                    |                        |                        |              |
| Entire coding region                                 | 11                    | 0.003              | -3.81 <sup>β</sup>      | -3.92 <sup>β</sup> | 3.71                   | 0.88                   | 4.23         |
| Non-signal peptide region                            | 5                     | 0.002              | -2.20                   | -2.48              | 3.07                   | 0                      | Ka>Ks        |
| Signal peptide region                                | 6                     | 0.004              | -3.90 <sup>β</sup>      | -3.90 <sup>β</sup> | 5.49                   | 3.33                   | 1.65         |

<sup>a</sup> Number of segregating sites.

<sup>b</sup> Nei's nucleotide diversity based on silent site.

<sup>c</sup> Fu and Li's *D*\* and *F*\*, and <sup>α</sup>, <sup>β</sup> represents statistical significance at *P* < 0.05, 0.02 level, respectively.

<sup>d</sup> Nonsynonymous.

<sup>e</sup> Synonymous.
