# Supplementary material for: The Lesson Learned from the Unique Evolutionary Story of Avirulence Gene AvrPii of Magnaporthe oryzae
Source: MDPI journal article supplement (doi:10.3390/genes14051065), 2023-05-11
Supplement: s1 [file s1]

**Table S3.** The full-length sequences of seven haplotype-chimeric mutants of the *AvrPii* family (sequence of *AvrPii-J* was in blue, and that of *AvrPii-C* in red; the coding sequences were in background color; also see **Fig. 2**)

**Mai1 (*AvrPii-J*<sub>pro</sub>/*C*<sub>CDS+3'</sub>)**

TGGTAGATATCCGCTGACTGGGGGCAACATTGGTTGGATTTTAAAGTACATATATAGAAACGAAAATAAGTGGA  
 GAAGAACAAGAGTAAGGGTTATTAATTACACGACTAAATGTGGTAATTTAGCTATGTTATAACCAGGCAAGCACTACA  
 AATAGCCCATGGCAATCAGGAAGAGGCCGATATGTTACGATTGAATAATAAAATATTTTATAAACTTGCATTTGGATG  
 TAAATTGTAAATTATGCATTTGAGCTCCTCTGTTTCTATTAAACAGAAATGTTTTTAAACAAGGTACCTAAATGCAATT  
 CTATATTTTTTATGCGGATTTATGCAGGCCCAAATCCGTAGGAAATACTATTAGTTATAATAATATAAAAAACCTCGGCT  
 TCTTGATATATTACTGTATAATTCCTTTTCTTCCCTCCTTATATTTTTTCATCTTAAAACTAAACATTTAAATTCAGCTTC  
 AAATATACCAAATCCCCTTTTATTCTTCCAATTTACCAAATGCAACTCTCCAAAATTACTTTTCGCTATTGCATTAT  
 ATGCAGTCGGAATCGCAGCACTTCCCACTCCGGCCTGCCTAAATGGCAACACTGAGGTGCAACCATCTCCGACGTTA  
 AACTTGGACCCCGCAGCGACAAGACTTATTATTATTGCTCCAAATGCGGCTTCGGCAGCAATGATTCCGACACGTATT  
 TTAATCACAAGTGCAAGTAATGTAAGTTGATATCTAAACGCATAATTTAACTCATTTTTTAAAAAATAAATTATTCTA  
 ACGTTTAATTATAATGCATACGAATTAAACAGCATTTTTCAAGCGCGTGACGGACAGTTATGGATTCTGCAAATTTTA  
 AATACCCGGTGTACGGCCAGGCATATATCGGAATGTGAGGATCAGGTCCCCACACCTACCCTCAGAATTACGACTCGG  
 CTCCACGTCGAGCCAGGGATAGGACAAAGGTCCACTCACCCCGGATTTAAACGCGTCTTTCCAACGCGCCGTCAAT  
 TGTAATTTCTCTCTTCTTCAATTTAGAATTTTTGGTCCATAGCGCCAATATACTGGGGTTCTACAATGTAGGCCTG  
 GCCGTAACATCAGCCAATTTTGCTGTTTAACGATTATTGGAAAAAGAATTTCTTTTTTATAAAAACGCCAAATCGA  
 AAATATTTACAACAAAAATTATTTAATTTGGGTGGCGTATAACGGGGTATTGTACGGCCAGGCATACATTGGAGAA  
 CCTCAGTGATTAGGCGCTATTAACGTTGCGTACCCCTGTTGGCACCCCCCTGTTGGCACCTGAAAATCTA

**Mai2 (*AvrPii-C*<sub>pro</sub>/*J*<sub>CDS+3'</sub>)**

TCAGCGGATATTCACCAAATAAGTAAATTTAATTAAAAAAGCAAAGCGCAAATTTATAAAAAAACATTAACATT  
 TCAAGTGAAGATAATTAAAGAAAAGGTAAATTAAAAGGCATAATAATTTGTAATAAGCGGTCTAATAAAATCTTTT  
 TTTACAAGATTGCGTCTTTATATAAATAGTAAATTATGCATTTGAGTTTTTTTTGTTTCTATTAAACAGTGGTACGGAGT  
 GGCGTGGCTAGGCGACTGCCAACCGTGACTCCACCCACGTGGTAAGGTGCTAGGGTTCGTTGTTGTGTATTGTTTTA  
 GGCGGTGCACGCGATTGGCATTGCGTGCCTTTCTTCTTTTTTTAGACTTAGCTTTAGATCTTCGAATAGAATCGCCC  
 CTATATTGCAACCTTGTCTCTTTGGTATCGCTTTCGTGACAAACAGAACTGTTTTTAAACAAGGTAATTAATTTGAAT

TTTGACCTTTACGCGGACTTATGCAAACCGAAATCCCTAGGAAATGCTATTAATCATATAATATAAAAAACCTCAACTT  
CTTGTA CACTACTTCGTTATATTTCCATTGCTATTCATCCTTTTTATTATAAAGCCAACGAATTGAATTCAGTTTTAGT  
ATACTAAGATCCCCTTGTATTTTTTTCCAACCTACCAAATGCAACTTTCCAAAATTACTTTCGCTATTGCATTATATGC  
AATCGGAATCGCAGCACTTCCCACTCCGGCCAGCCTGAATGGCAACACTGAGGTCGCAACCATCTCCGACGTTAAACT  
TGAGGCCCGCAGCGACACCACTTATCATAAATGCTCCAAATGCGGTTATGGCAGCGATGATTCCGACGCGTATTTTAA  
TCATAAATGCAACTAATGTAAGTTAAAATCTGAAAGCGCACGATTTAAATTAGTTTCAAATATAAATTATCTTAAAGT  
TTAATTATAGCGCATACAAAGTAAGCTGGATTTTTTCCAAACGAACGGCGGACAGTTATGGACTATTGCGGGAATTTCA  
AGGATAGGAAAAGCCAATTTGAAATATCCGGAATACTTTTTTCCAAGCTTAACCATTAATAACATGTCTTAAATCAAT  
CTACCTTTCGCGTTTAAATTTTTTCAAACATAATGAACTGATATCAAACCGAGGATGCTGCGAGCTGCGTTATGTTA  
ATTTGTCTGTTTTCTACACGATAGCGACTGATAATAGCAACAACACACATGTACATACACACATATACACATATATACCA  
TTATTCCAAACACGTTAAGAAGTGTGAAAAAATAGGTGGTTTTTTATTTTGGCATGTTGGTAAAGCGTGAGAGCAGAG  
TGGAGCAACCCTTGGATAATGGCTACTAAGGATATCCATCTGTGCATTATATAATAACGTGGATGTACACCGAGTCGCG  
CAGGACACCGAGCGCGCACCCCTTTATACATAGTAAATCCGTTCTGTGTGCTTCGCCCAATTCAAGTCTAGTTTTTCACCAA  
AGTTCCAAATCTG

### **Mai3 (*AvrPii-J*/C-1)**

TGGTAGATATCCGCTGACTGGGGGCAACATTGGTTGGATTTTAAAGTACATATATAGAAACGAAAATAAGTGGAAAAA  
GAAGAACAAGAGTAAGGGTTATTAATTACACGACTAAATGTGGTAATTTAGCTATGTTATAACCAGGCAAGCACTACA  
AATAGCCCATGGCAATCAGGAAGAGGCCGATATGTTACGATTGAATAATAAAATATTTTATAAACTTGCATTTGGATG  
TAAATTGTAAATTATGCATTTGAGCTCCTCTGTTTCTATTAACAGAAATGTTTTTAAACAAGGTACCTAAATGCAATT  
CTATATTTTTTATGCGGATTTATGCAGGCCCAAATCCGTAGGAAATACTATTAGTTATAATAATATAAAAAACCTCGGCT  
TCTTGATATTTACTGTATAATTCCTTTTCTTCCCTCCTTATATTTTTTCATCTTAAACTAAACATTTAAATTCAGCTTC  
AAATATACCAAATCCCCTTTTATTCCTTCCAATTTACCAAATGCAACTCTCCAAAATTACTTTCGCTATTGCATTAT  
ATGCAGTCGGAATCGCAGCACTTCCCACTCCGGCCAGCCTGAATGGCAACACTGAGGTCGCAACCATCTCCGACGTTA  
AACTTGAGGCCCGCAGCGACACCACTTATCATAAATGCTCCAAATGCGGTTATGGCAGCGATGATTCCGACGCGTATT  
TTAATCATAAATGCAACTAATGTAAGTTAAAATCTGAAAGCGCACGATTTAAATTAGTTTCAAATATAAATTATCTTA  
ACGTTTAAATTATAGCGCATACAAAGTAAGCTGGATTTTTTCCAAACGAACGGCGGACAGTTATGGACTATTGCGGGAAT  
TTCAAGGATAGGAAAAGCCAATTTGAAATATCCGGAATACTTTTTTCCAAGCTTAACCATTAATAACATGTCTTAAAT  
CAATCTACCTTTCGCGTTTAAATTTTTTCAAACATAATGAACTGATATCAAACCGAGGATGCTGCGAGCTGCGTTAT  
GTTAATTTGTCTGTTTTCTACACGATAGCGACTGATAATAGCAACAACACACATGTACATACACACATATACACATATAT

ACCATTATTCCAAACACGTTAAGAACTGTGAAAAAATAGGTGGTTTTTATTTTGGCATGTTGGTAAAGCGTGAGAGC  
AGAGTGGAGCAACCCCTTGGATAATGGCTACTAAGGATATCCATCTGTGCATTATATAATAACGTGGATGTACACCGAGT  
CGCGCAGGACACCGAGCGCGCACCCCTTTATACATAGTAAATCCGTTTCGTGTGCTTCGCCCAATTCAAGTCTAGTTTTCA  
CCAAAGTTCCAAATCTG

**Mai4 (*AvrPii-J/C-2*)**

TGGTAGATATCCGCTGACTGGGGGCAACATTGGTTGGATTTTAAAGTACATATATAGAAACGAAAATAAGTGAAAAA  
GAAGAACAAGAGTAAGGGTTATTAATTACACGACTAAATGTGGTAATTTAGCTATGTTATAACCAGGCAAGCACTACA  
AATAGCCCATGGCAATCAGGAAGAGGCCGATATGTTACGATTGAATAATAAAATATTTTATAAACTTGCATTTGGATG  
TAAATTGTAAATTATGCATTTGAGCTCCTCTGTTTCTATTAACAGAAATGTTTTTAAACAAGGTACCTAAATGCAATT  
CTATATTTTTTATGCGGATTTATGCAGGCCCAAATCCGTAGGAAATACTATTAGTTATAATAATATAAAAAACCTCGGCT  
TCTTGATATATTACTGTATAATTCCTTTTCTTCCCTCCTTATATTTTTTCATCTTAAAACTAAACATTTAAATTCAGCTTC  
AAATATACCAAATCCCCTTTTATTCTTCCAATTTACCAAATGCAACTCTCCAAAATTACTTTTCGCTATTGCATTAT  
ATGCAGTCGGAATCGCAGCACTTCCCACTCCGGCCTGCCATAATGGCAACACTGAGGTGCGCAACCATCTCCGACGTTA  
AACTTGGACCCCGCAGCGACACCACTTATCATAAATGCTCCAAATGCGGTTATGGCAGCGATGATTCCGACGCGTATT  
TTAATCATAAATGCAACTAATGTAAGTTAAATCTGAAAGCGCACGATTTAAATTAGTTTCAAATATAAATTATCTTA  
ACGTTTAATTATAGCGCATACAAAGTAAGCTGGATTTTTTCCAAACGAACGGCGGACAGTTATGGACTATTGCGGGAAT  
TTCAAGGATAGGAAAAGCCAATTTGAAATATCCGGAATACTTTTTTCCAAGCTTAACCATTAATAACATGTCTTAAAT  
CAATCTACCTTTTCGCGTTTAAATTTTTTCAAACATAATGAACTGATATCAAACCGAGGATGCTGCGAGCTGCGTTAT  
GTTAATTTGTCGTTTTTCTACACGATAGCGACTGATAATAGCAACAACACACATGTACATACACACATATACACATATAT  
ACCATTATTCCAAACACGTTAAGAACTGTGAAAAAATAGGTGGTTTTTATTTTGGCATGTTGGTAAAGCGTGAGAGC  
AGAGTGGAGCAACCCCTTGGATAATGGCTACTAAGGATATCCATCTGTGCATTATATAATAACGTGGATGTACACCGAGT  
CGCGCAGGACACCGAGCGCGCACCCCTTTATACATAGTAAATCCGTTTCGTGTGCTTCGCCCAATTCAAGTCTAGTTTTCA  
CCAAAGTTCCAAATCTG

**Mai5 (*AvrPii-J/C-3*)**

TGGTAGATATCCGCTGACTGGGGGCAACATTGGTTGGATTTTAAAGTACATATATAGAAACGAAAATAAGTGAAAAA  
GAAGAACAAGAGTAAGGGTTATTAATTACACGACTAAATGTGGTAATTTAGCTATGTTATAACCAGGCAAGCACTACA  
AATAGCCCATGGCAATCAGGAAGAGGCCGATATGTTACGATTGAATAATAAAATATTTTATAAACTTGCATTTGGATG  
TAAATTGTAAATTATGCATTTGAGCTCCTCTGTTTCTATTAACAGAAATGTTTTTAAACAAGGTACCTAAATGCAATT  
CTATATTTTTTATGCGGATTTATGCAGGCCCAAATCCGTAGGAAATACTATTAGTTATAATAATATAAAAAACCTCGGCT

TCTTGTATATTACTGTATAATTCCTTTTCTTCCCTCCTTATATTTTTTCATCTTAAAACTAAACATTTAAATTCAGCTTC  
AAATATACCAAATCCCCTTTTATTCCTTCCAATTTACCAAATGCAACTCTCCAAAATTACTTTTCGCTATTGCATTAT  
ATGCAGTCGGAATCGCAGCACTTCCCACTCCGGCCTGCCTAAATGGCAACACTGAGGTTCGCAACCATCTCCGACGTTA  
AACTTGGACCCCGCAGCGACAAGACTTATTATTATTGCTCCAAATGCGGCTTCGGCAGCGATGATTCCGACGCGTATT  
TTAATCATAAATGCAACTAATGTAAGTTAAAATCTGAAAGCGCACGATTTAAATTAGTTTCAAATATAAAATTATCTTA  
ACGTTTAATTATAGCGCATACAAAGTAAGCTGGATTTTTCCAAACGAACGGCGGACAGTTATGGACTATTGCGGGAAT  
TTCAAGGATAGGAAAAGCCAATTTGAAATATCCGGAATACTTTTTCCAAGCTTAACCATTAATAACATGTCTTAAAT  
CAATCTACCTTTTCGCGTTTAAATTTTTTCAAACATAATGAACTGATATCAAACCGAGGATGCTGCGAGCTGCGTTAT  
GTTAATTTGTCTGTTTTCTACACGATAGCGACTGATAATAGCAACAACACACATGTACATACACACATATACACATATAT  
ACCATTATTCCAAACACGTTAAGAACTGTGAAAAAATAGGTGGTTTTTATTTTGGCATGTTGGTAAAGCGTGAGAGC  
AGAGTGGAGCAACCTTGGATAATGGCTACTAAGGATATCCATCTGTGCATTATATAATAACGTGGATGTACACCGAGT  
CGCGCAGGACACCGAGCGCGCACCTTTTATACATAGTAAATCCGTTTCGTGTGCTTCGCCCAATTCAAGTCTAGTTTTCA  
CCAAAGTTCCAAATCTG

**Mai6 (*AvrPii-J*<sub>pro+CDS/C3'</sub>)**

TGGTAGATATCCGCTGACTGGGGGCAACATTGGTTGGATTTTAAAGTACATATATAGAAACGAAAATAAGTGGAAAAA  
GAAGAACAAGAGTAAGGGTTATTAATTACACGACTAAATGTGGTAATTTAGCTATGTTATAACCAGGCAAGCACTACA  
AATAGCCCATGGCAATCAGGAAGAGGCCGATATGTTACGATTGAATAATAAAATATTTTATAAACTTGCATTTGGATG  
TAAATTGTAAATTATGCATTTGAGCTCCTCTGTTTCTATTAACAGAAATGTTTTTAAACAAGGTACCTAAATGCAATT  
CTATATTTTTTATGCGGATTTATGCAGGCCCAAATCCGTAGGAAATACTATTAGTTATAATAATATAAAAACCTCGGCT  
TCTTGTATATTACTGTATAATTCCTTTTCTTCCCTCCTTATATTTTTTCATCTTAAAACTAAACATTTAAATTCAGCTTC  
AAATATACCAAATCCCCTTTTATTCCTTCCAATTTACCAAATGCAACTTTCCAAAATTACTTTTCGCTATTGCATTAT  
ATGCAATCGGAATCGCAGCACTTCCCACTCCGGCCAGCCTGAATGGCAACACTGAGGTTCGCAACCATCTCCGACGTTA  
AACTTGAAGGCCCGCAGCGACCACTTATCATAAATGCTCCAAATGCGGTTATGGCAGCGATGATTCCGACGCGTATT  
TTAATCATAAATGCAACTAATGTAAGTTGATATCTAAACGCATAATTTAACTCATTTTTTAAAAAATAAATTATTCTAA  
CGTTTAATTATAATGCATACGAATTAAACAGCATTTTTTCAAGCGCGTGACGGACAGTTATGGATTCTGCAAATTTTAA  
ATACCCGGTGTCACGGCCAGGCATATATCGGAATGTGAGGATCAGGTCCCCACACCTACCCTCAGAATTACGACTCGGC  
TCCACGTGAGCCAGGGATAGGACAAAGGGTCCACTCACCCCGGATTTAAAACGCGTCTTTCCAACGCGCCGTCAATT  
GTAATTTCTCTCTTCTCTTCAATTTAGAATTTTTGGTCCATAGCGCCCAATATACTGGGGTTCTACAATGTAGGCCTGG  
CCGTAACATCAGCCAATTTTGCTGTTTAACGATTATTGGAAAAAGAATTTTCTTTTTTATAAAAACGCCAAATCGAA

AATATTTACAACAAAAATTATTTAATTTGGGTGGCGTATAACGGGGTTATTGTCACGGCCAGGCATACATTGGAGAAC  
CTCAGTGTATTAGGCGCTATTAACGTTGCGTACCCCCTGTTCGGCACCCCCCTGTTTCGGCACCCCTGAAAATCTA

**Mai7 (*AvrPii-C<sub>pro+CDS</sub>/J3*)**

TCAGCGGATATTCACCAAAATAAGTAAATATTTAATTAATAAGCAAAGCGCAAATTTATAAAAAAACATTAACATT  
TCAAGTGAAGATAATTAAAGAAAAGGTAAATTAAAAGGCATAATAATTCGTAAAAAGCGGTCTAATAAAATCTTTT  
TTTACAAGATTGCGTCTTTATATAAATAGTAAATTATGCATTTGAGTTTTTTTTGTTTCTATTAACAGTGGTACGGAGT  
GGCGTGGCTAGGCGACTGCCAACCGTGA CTCCACCCACGTGGTAAGGTGCTAGGGTTCGTTGTTGTGTATTTCGTTTA  
GGCGCGTGACGCGATTGGCATTGCGTGCCTTTCTTCTTTTTTTAGACTTAGCTTTAGATCTTCGAATAGAATCGCCC  
CTATATTGCAACCTTGTCTCTTTGGTATCGCTTTTCGTGACAAACAGAACTGTTTTTAAACAAGGTAATTAATTTGAAT  
TTTGACCTTTACGCGGACTTATGCAAACCGAAATCCCTAGGAAATGCTATTAATCATATAATATAAAAAACCTCAACTT  
CTTGTA CACTACTTCGTTATATTTCCATTGCTATTCATCCTTTTTATTATAAAGCCAACGAATTGAATTCAGTTTTAGT  
ATACTAAGATCCCCTTGATTTTTTTCCAACCTACCAAAATGCAACTCTCCAAAATTACTTTTCGCTATTGCATTATATGC  
AGTCGGAATCGCAGCACTTCCCACTCCGGCCTGCCTAAATGGCAACACTGAGGTGCGAACCATCTCCGACGTTAAACT  
TGGACCCCGCAGCGACAAGACTTATTATTATTGCTCCAAATGCGGCTTCGGCAGCAATGATTCCGACACGTATTTTAA  
TCACAAGTGCAAGTAATGTAAGTTAAAATCTGAAAGCGCACGATTTAAATTAGTTTCAAATATAAATTATCTTAACGT  
TTAATTATAGCGCATACAAAGTAAGCTGGATTTTTTCCAAACGAACGGCGGACAGTTATGGACTATTGCGGGAATTTCA  
AGGATAGGAAAAGCCAATTTGAAATATCCGGAATACTTTTTTCCAAGCTTAACCATTAATAACATGTCTTAAATCAAT  
CTACCTTTTCGCGTTTTAAATTTTTTCAAACATAATGAACTGATATCAAACCGAGGATGCTGCGAGCTGCGTTATGTTA  
ATTTGTGCTTTTCTACACGATAGCGACTGATAATAGCAACAACACACATGTACATACACACATATACACATATATACCA  
TTATTCCAAACACGTTAAGAACTGTGAAAAAATAGGTGGTTTTTTATTTTGGCATGTTGGTAAAGCGTGAGAGCAGAG  
TGGAGCAACCCTTGATAATGGCTACTAAGGATATCCATCTGTGCATTATATAATAACGTGGATGTACACCGAGTCGCG  
CAGGACACCGAGCGCGCACCCCTTTATACATAGTAAATCCGTTTCGTGTGCTTCGCCCAATTCAAGTCTAGTTTTTCACCAA  
AGTTCCAAATCTG
