# Supplementary material for: The Lesson Learned from the Unique Evolutionary Story of Avirulence Gene AvrPii of Magnaporthe oryzae
Source: Genes (Basel). 2023 May 11;14(5):1065. doi: 10.3390/genes14051065 (PMC10218241; doi:10.3390/genes14051065)
Supplement: Supplementary file 1 [file genes-14-01065-s001.zip]

Archive with 23 entries (19 files):
- genes-2373462-supplementary/
- genes-2373462-supplementary/23-5-7 Supplementary Materials for AvrPii/
- genes-2373462-supplementary/23-5-7 Supplementary Materials for AvrPii/Figure S1. Tail- PCR of AvrPii-C.pptx
- genes-2373462-supplementary/23-5-7 Supplementary Materials for AvrPii/Figure S2. Divergence and primers of AvrPii-C_J.pptx
- genes-2373462-supplementary/23-5-7 Supplementary Materials for AvrPii/Figure S3. AvrPii-C_J domain-swapping.pptx
- genes-2373462-supplementary/23-5-7 Supplementary Materials for AvrPii/Figure S4. AvrPii mutants_3D.pptx
- genes-2373462-supplementary/23-5-7 Supplementary Materials for AvrPii/Figure S5. AvrPii_Pii Y2H.pptx
- genes-2373462-supplementary/23-5-7 Supplementary Materials for AvrPii/Table S1. Primers & PCR programs.pdf
- genes-2373462-supplementary/23-5-7 Supplementary Materials for AvrPii/Table S2. Phenotypes, and genotypes of AvrPii.pdf
- genes-2373462-supplementary/23-5-7 Supplementary Materials for AvrPii/Table S3. The FL sequemces of AvrPii mutants.pdf
- genes-2373462-supplementary/23-5-7 Supplementary Materials for AvrPii/Table S4. Comparison of evolutionary parameters.pdf
- genes-2373462-supplementary/__MACOSX/
- genes-2373462-supplementary/__MACOSX/._23-5-7 Supplementary Materials for AvrPii
- genes-2373462-supplementary/__MACOSX/23-5-7 Supplementary Materials for AvrPii/
- genes-2373462-supplementary/__MACOSX/23-5-7 Supplementary Materials for AvrPii/._Fig. S1. Tail- PCR of AvrPii-C.pptx
- genes-2373462-supplementary/__MACOSX/23-5-7 Supplementary Materials for AvrPii/._Fig. S2. Divergence and primers of AvrPii-C_J.pptx
- genes-2373462-supplementary/__MACOSX/23-5-7 Supplementary Materials for AvrPii/._Fig. S3.  AvrPii-C_J domain-swapping.pptx
- genes-2373462-supplementary/__MACOSX/23-5-7 Supplementary Materials for AvrPii/._Fig. S4. AvrPii mutants_3D.pptx
- genes-2373462-supplementary/__MACOSX/23-5-7 Supplementary Materials for AvrPii/._Fig. S5. AvrPii_Pii Y2H.pptx
- genes-2373462-supplementary/__MACOSX/23-5-7 Supplementary Materials for AvrPii/._Table S1. Primers & PCR programs.docx
- genes-2373462-supplementary/__MACOSX/23-5-7 Supplementary Materials for AvrPii/._Table S2. Phenotypes, and genotypes of AvrPii.docx
- genes-2373462-supplementary/__MACOSX/23-5-7 Supplementary Materials for AvrPii/._Table S3. The FL sequemces of AvrPii mutants.docx
- genes-2373462-supplementary/__MACOSX/23-5-7 Supplementary Materials for AvrPii/._Table S4. Comparison of evolutionary parameters.docx
